# Supplementary material for: (4-Ferrocenylphenyl)propargyl ether derived carbohydrate triazoles: influence of a hydrophobic linker on the electrochemical and cytotoxic properties
Source: Royal Society of Chemistry journal article supplement (doi:10.1039/c3nj01022h), 2013-10-02
Supplement: c3nj01022h.pdf [file c3nj01022h.pdf]

**Supporting Information**

**(4-Ferrocenylphenyl)propargyl ether derived carbohydrate triazoles: Influence of a hydrophobic linker on the electrochemical and cytotoxic properties**

Sadanala Bhavya Deepthi,<sup>a</sup> Rajiv Trivedi,<sup>\*a</sup> Lingamallu Giribabu,<sup>a</sup> Pombala Sujitha,<sup>b</sup> C. Ganesh Kumar<sup>b</sup> and B. Sridhar<sup>c</sup>

*\* Inorganic and Physical Chemistry Division, CSIR-Indian Institute of Chemical Technology (IICT), Hyderabad, Andhra Pradesh, India 500007. Fax: (+) 91-40-2716 0921; Tel: (+) 91-40-27191667; E-mail: [trivedi@iict.res.in](mailto:trivedi@iict.res.in), [rtrajiv401@gmail.com](mailto:rtrajiv401@gmail.com)*

### General procedure for the synthesis of carbohydrate azides (**2c** and **2e**)

To a stirred solution of 5-azido-5-deoxy-1,2-*O*-isopropylidene- $\alpha$ -D-xylofuranose (1.1 equiv.) in anhydrous dichloromethane, a solution of acid chloride (1 equiv.) and triethylamine was added drop wise. The reaction mixture was stirred for 6 h at room temperature and then quenched with water. The reaction mixture was extracted with dichloromethane, washed with water and dried in vacuum. The resulting crude product was purified by column chromatography.

### 3-*O*-Acetyl-5-azido-5-deoxy-1,2-*O*-isopropylidene- $\alpha$ -D-xylofuranose (**2c**)

The reaction of 5-azido-5-deoxy-1,2-*O*-isopropylidene- $\alpha$ -D-xylofuranose (**2b**) (473 mg, 2.2 mmol) with acetyl chloride (156 mg, 2 mmol) resulted **2c** as colourless liquid. Yield: 0.46 g (89%);  $[\alpha]_D^{24}$  -16.18 (c 1.8, CHCl<sub>3</sub>); IR (neat,  $\nu_{\max}$ , cm<sup>-1</sup>): 2988, 2103, 1749, 1376, 1222, 1071; <sup>1</sup>H NMR (300 MHz, CDCl<sub>3</sub>):  $\delta$  (ppm) 1.13 (s, 3H, CH<sub>3</sub>), 1.52 (s, 3H, CH<sub>3</sub>), 2.11 (s, 3H, CH<sub>3</sub>), 3.41-3.54 (m, 2H, H-5), 4.38-4.43 (m, 1H, H-4), 4.54 (d, 1H, *J* = 3.7 Hz, H-2), 5.20 (d, 1H, *J* = 2.8 Hz, H-3), 5.93 (d, 1H, *J* = 3.7 Hz, H-1); <sup>13</sup>C (75.5 MHz, CDCl<sub>3</sub>):  $\delta$  (ppm) = 20.63, 26.14, 26.62, 49.13, 76.23, 77.52, 83.35, 104.71, 112.29, 169.60; ESI (in CH<sub>3</sub>OH): *m/z* 258 [M+H]<sup>+</sup>; Anal. calc. for C<sub>10</sub>H<sub>15</sub>N<sub>3</sub>O<sub>5</sub> (257.24): C 46.69, H 5.88, N 16.33; found: C 46.42, H 5.72, N 16.18.

### 5-Azido-3-benzoyl-5-deoxy-1,2-*O*-isopropylidene- $\alpha$ -D-xylofuranose (**2e**)

The reaction of 5-azido-5-deoxy-1,2-*O*-isopropylidene- $\alpha$ -D-xylofuranose (**2b**) (473 mg, 2.2 mmol) with benzoyl chloride (280 mg, 2 mmol) resulted **2e** as colourless liquid. Yield: 0.58 g (91 %);  $[\alpha]_D^{25}$  -1.78 (c 1.8, CHCl<sub>3</sub>); IR (neat,  $\nu_{\max}$ , cm<sup>-1</sup>): 3069, 2990, 2103, 1788, 1725, 1266, 1067; <sup>1</sup>H NMR (500 MHz, CDCl<sub>3</sub>):  $\delta$  (ppm) 1.35 (s, 3H, CH<sub>3</sub>), 1.58 (s, 3H, CH<sub>3</sub>), 3.53-3.54 (m, 1H, H-5), 3.60-3.64 (m, 1H, H-5), 4.53-4.65 (m, 1H, H-4), 4.69 (d, 1H, *J* = 2.9 Hz,

Electronic Supplementary Information (ESI) for the New Journal of Chemistry

H-2), 4.58 (d, 1H,  $J = 2.0$  Hz, H-3), 6.03 (d, 1H,  $J = 2.9$  Hz, H-1), 7.48 (t, 2H,  $J = 7.9$  Hz, Ar), 7.62 (t, 1H,  $J = 7.9$  Hz, Ar), 8.04 (d, 2H,  $J = 7.9$  Hz, Ar);  $^{13}\text{C}$  (75.5 MHz,  $\text{CDCl}_3$ ):  $\delta$  (ppm) 26.13, 26.62, 49.29, 76.57, 77.84, 83.38, 104.80, 112.36, 128.54, 128.88, 129.65, 133.64, 165.10; ESI-MS (in  $\text{CH}_3\text{OH}$ ):  $m/z$  320  $[\text{M}+\text{H}]^+$ ; Anal. calc. for  $\text{C}_{15}\text{H}_{17}\text{N}_3\text{O}_5$  (319.31): C 56.42, H 5.37, N 13.16; found: C 56.26, H 5.10, N 12.94.

Figure S1:  $^1\text{H}$  NMR spectrum of **1**

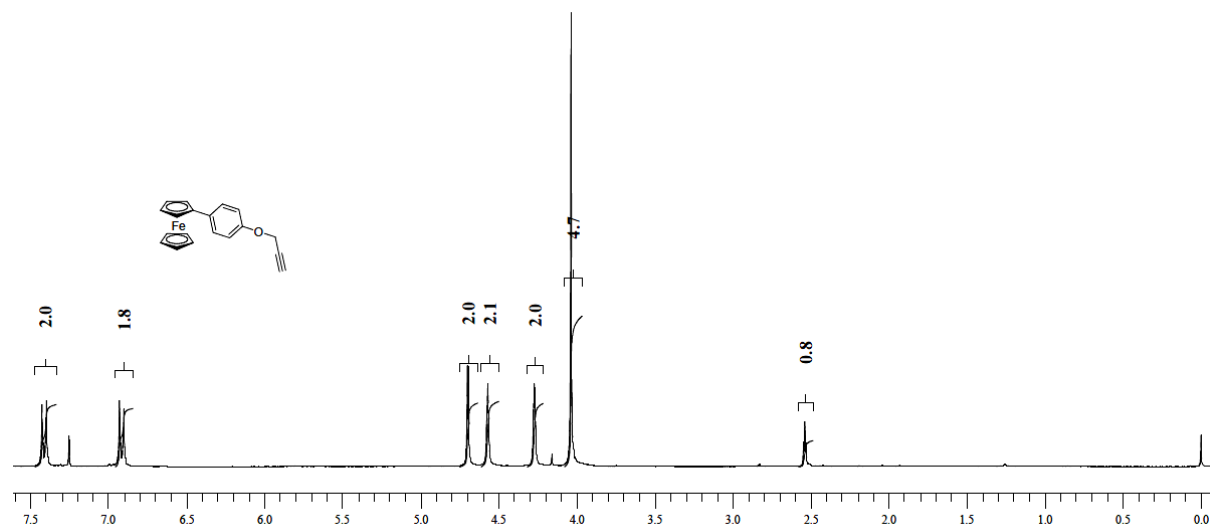

Figure S2:  $^{13}\text{C}$  NMR spectrum of **1**

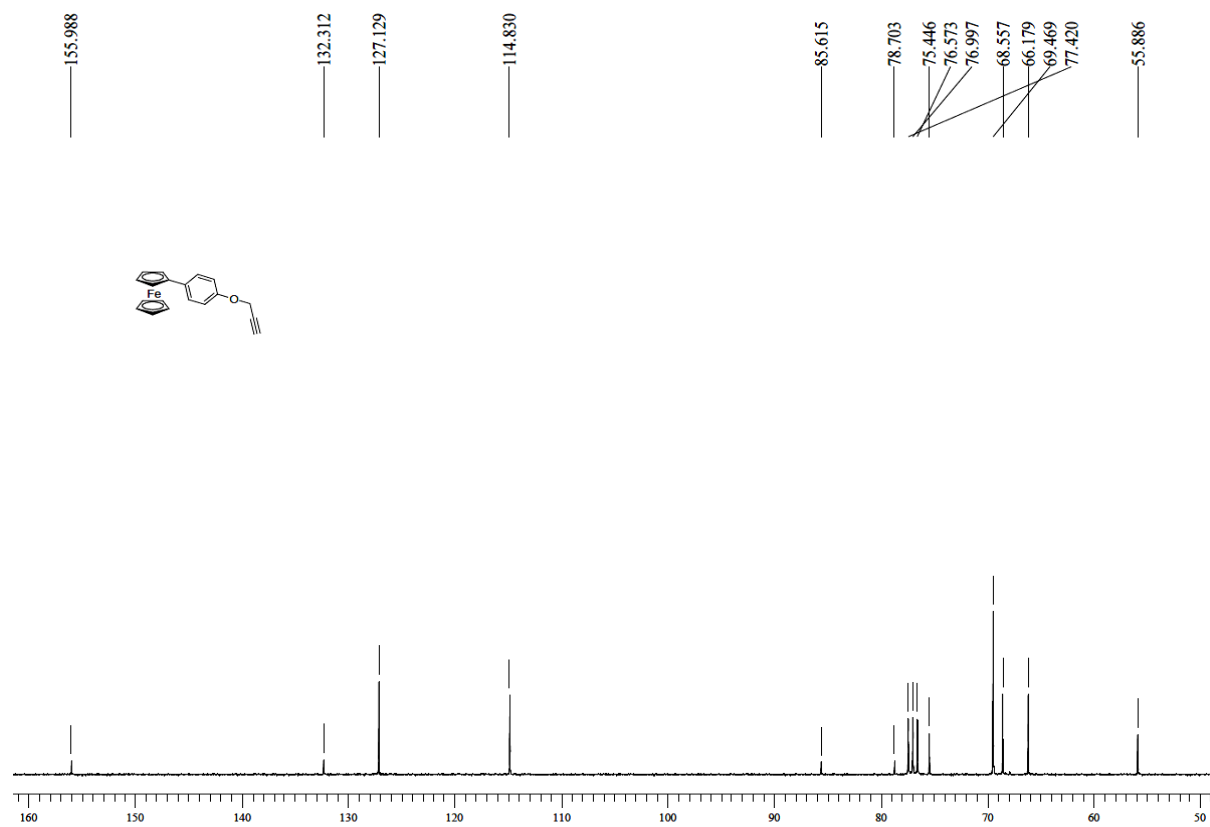

Figure S3:  $^1\text{H}$  NMR spectrum of **3a**

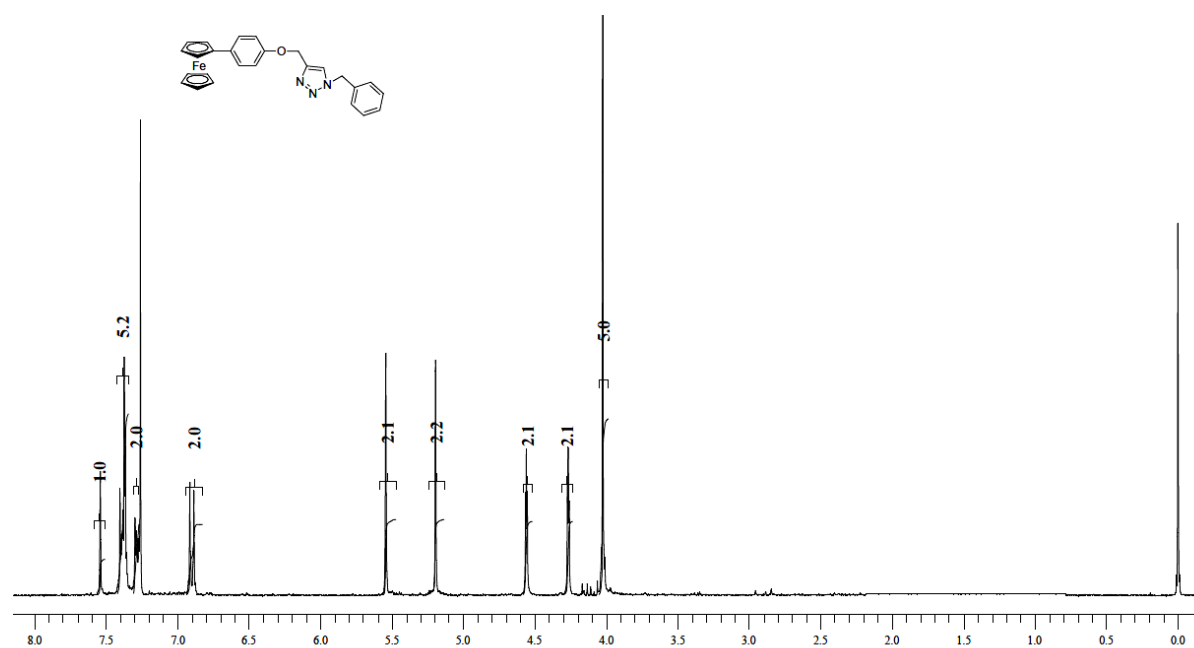

Figure S4:  $^{13}\text{C}$  NMR spectrum of **3a**

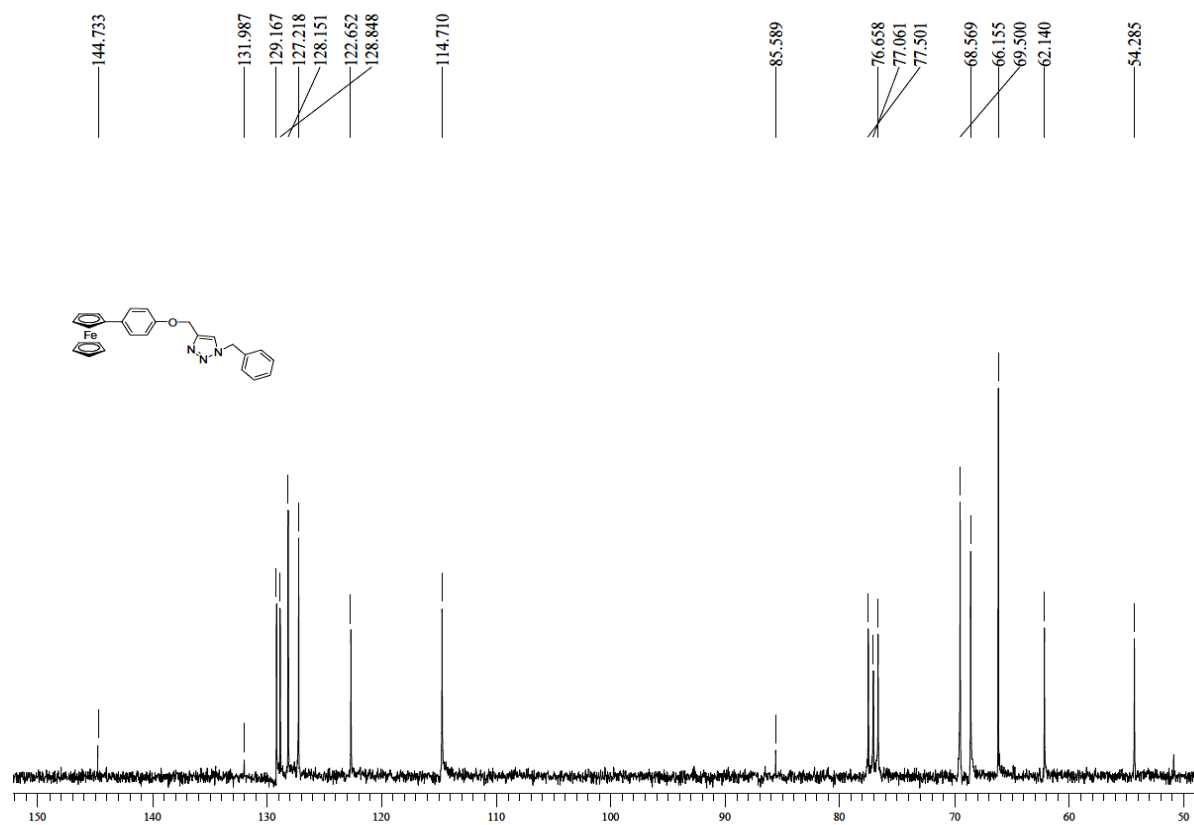

Figure S5:  $^1\text{H}$  NMR spectrum of **3b**

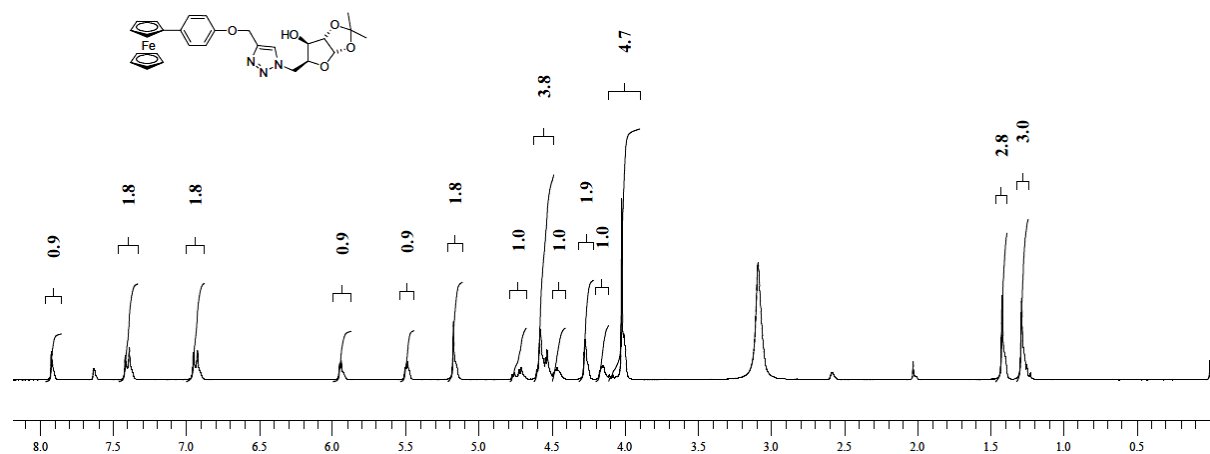

Figure S6:  $^{13}\text{C}$  NMR spectrum of **3b**

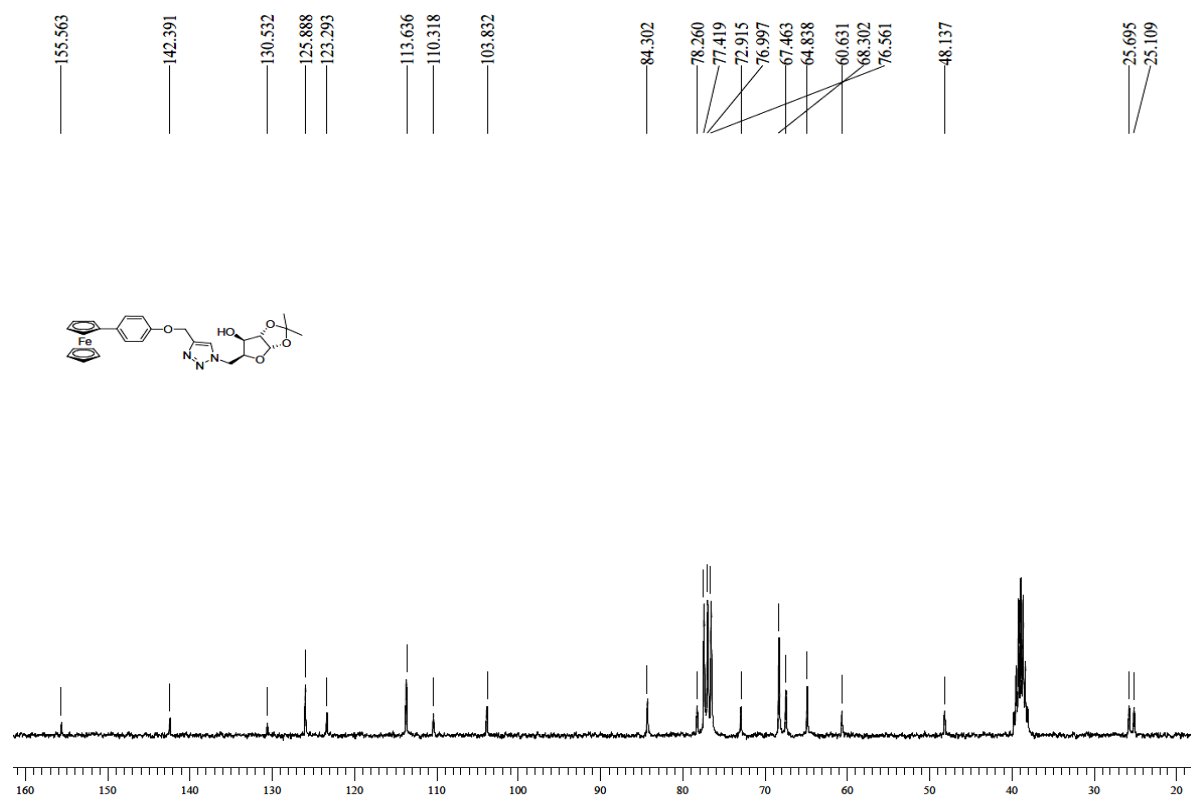

Figure S7:  $^1\text{H}$  NMR spectrum of **3c**

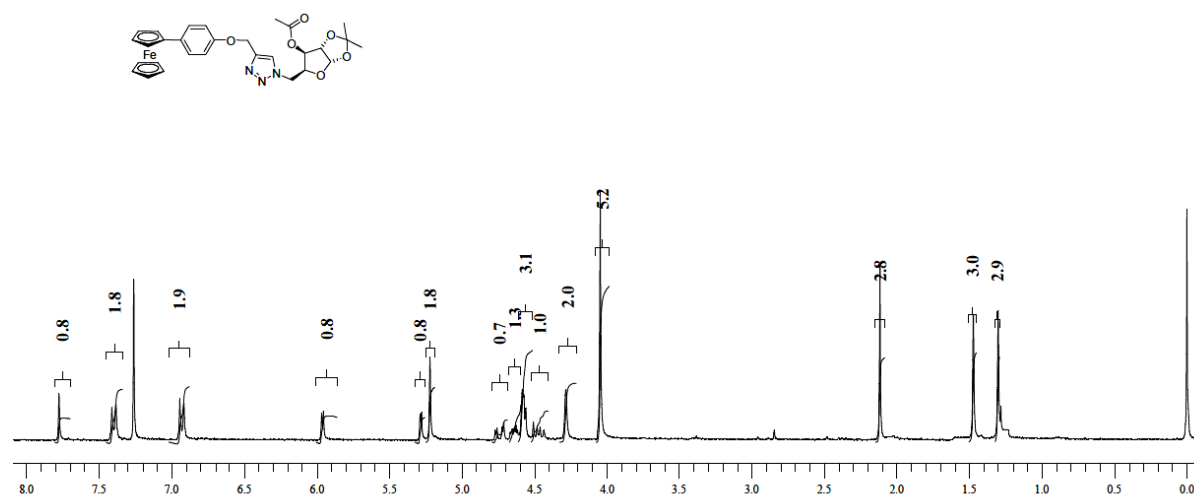

Figure S8:  $^{13}\text{C}$  NMR spectrum of **3c**

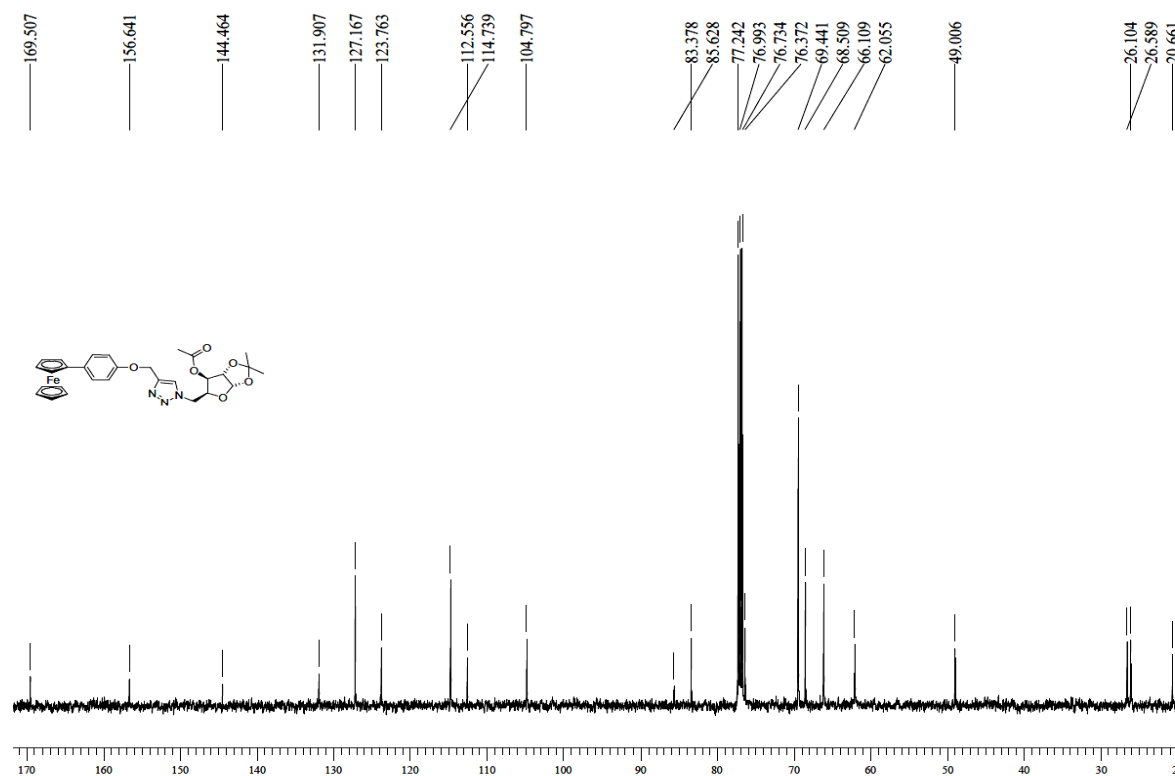

Figure S9:  $^1\text{H}$  NMR spectrum of **3d**

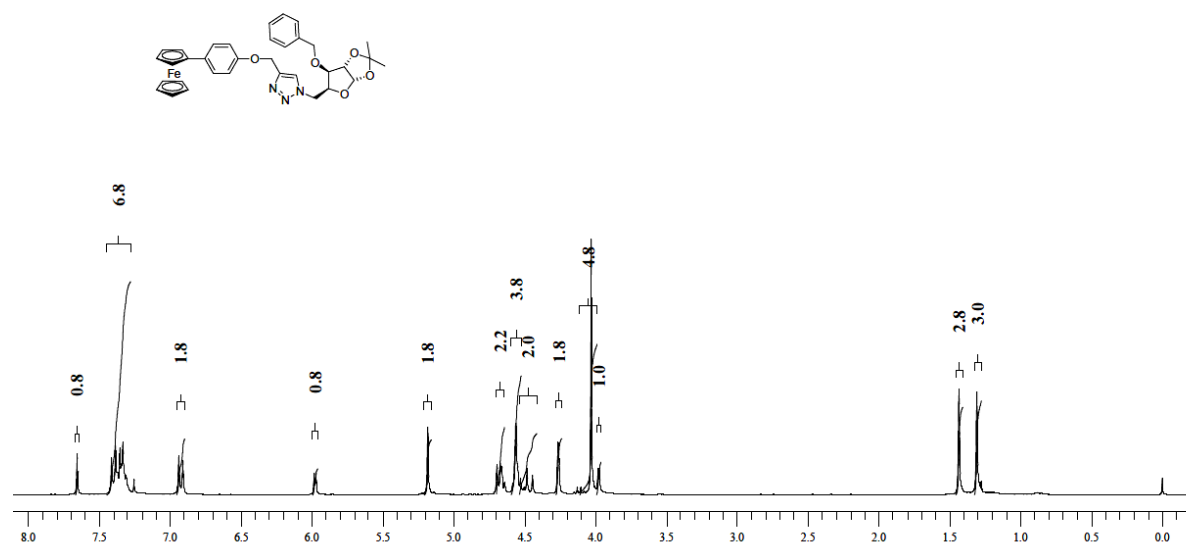

Figure S10:  $^{13}\text{C}$  NMR spectrum of **3d**

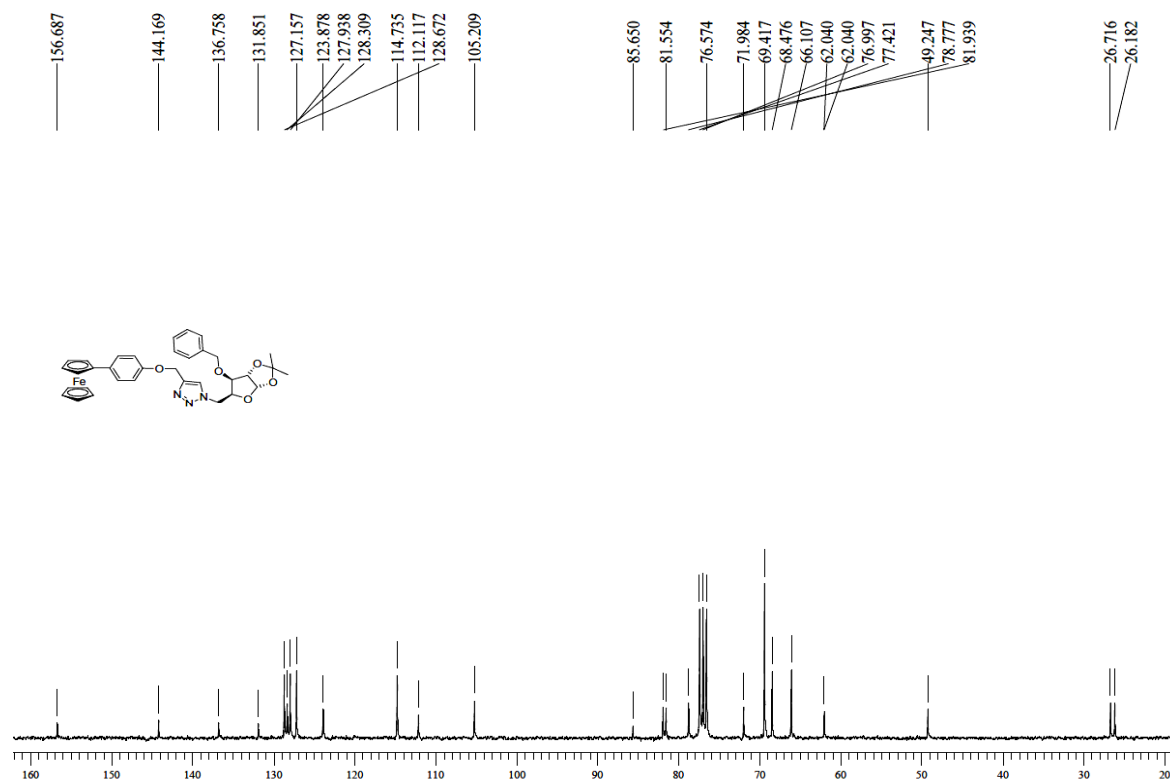



Figure S11:  $^1\text{H}$  NMR spectrum of **3e**

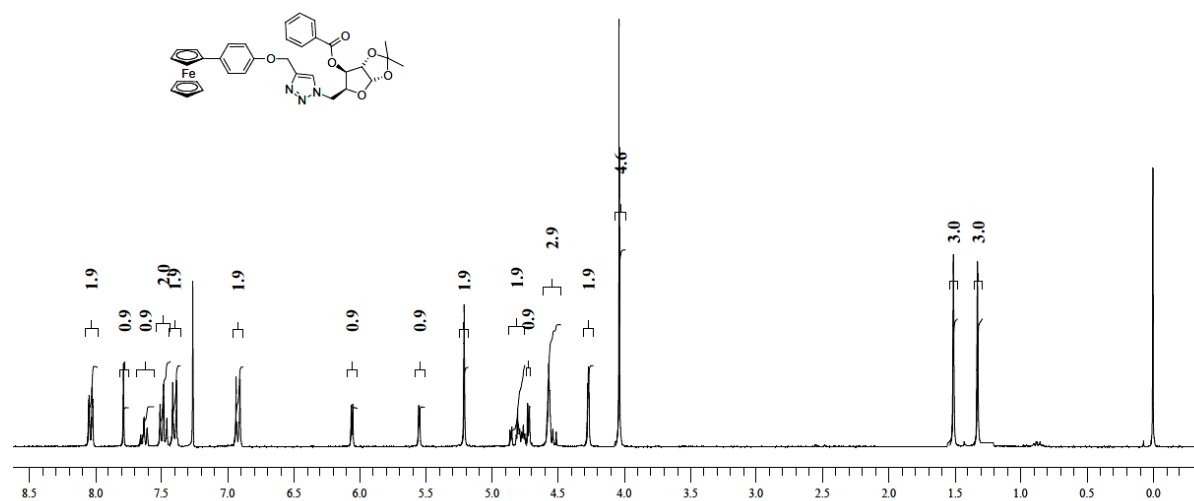

Figure S12:  $^{13}\text{C}$  NMR spectrum of **3e**

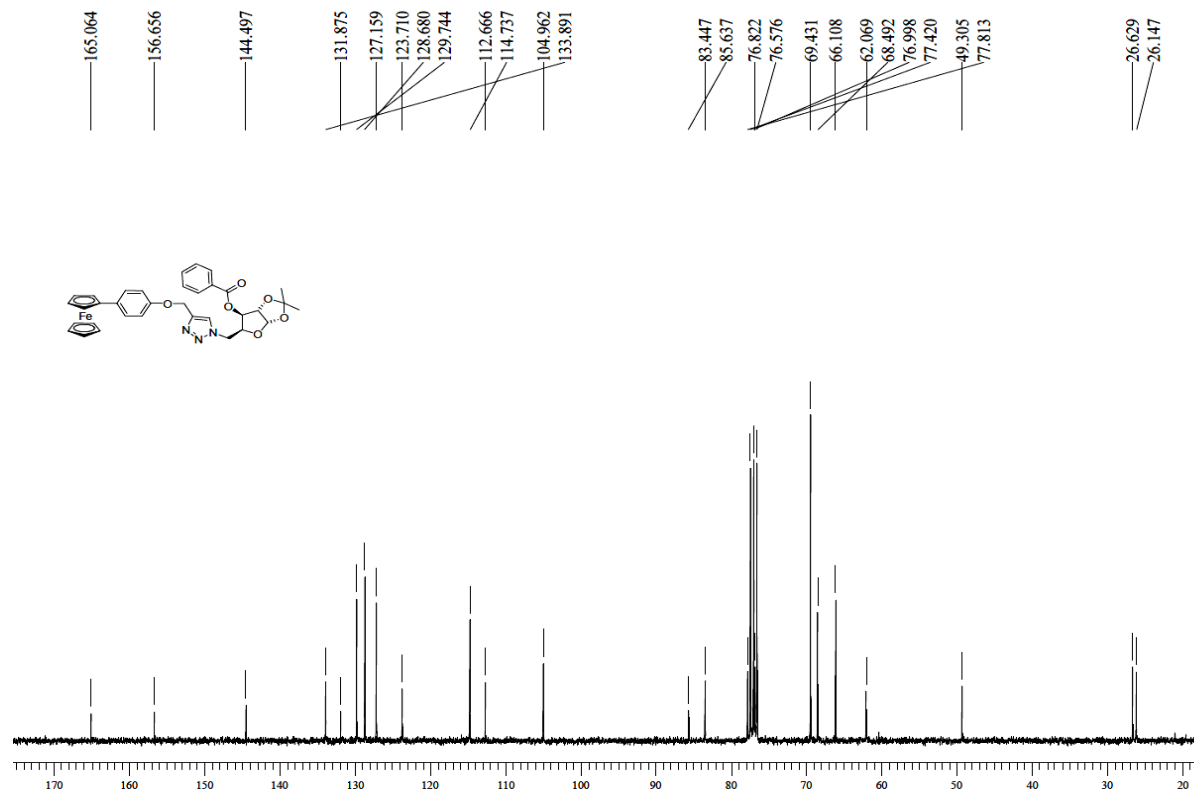

Figure S13:  $^1\text{H}$  NMR spectrum of **3f**

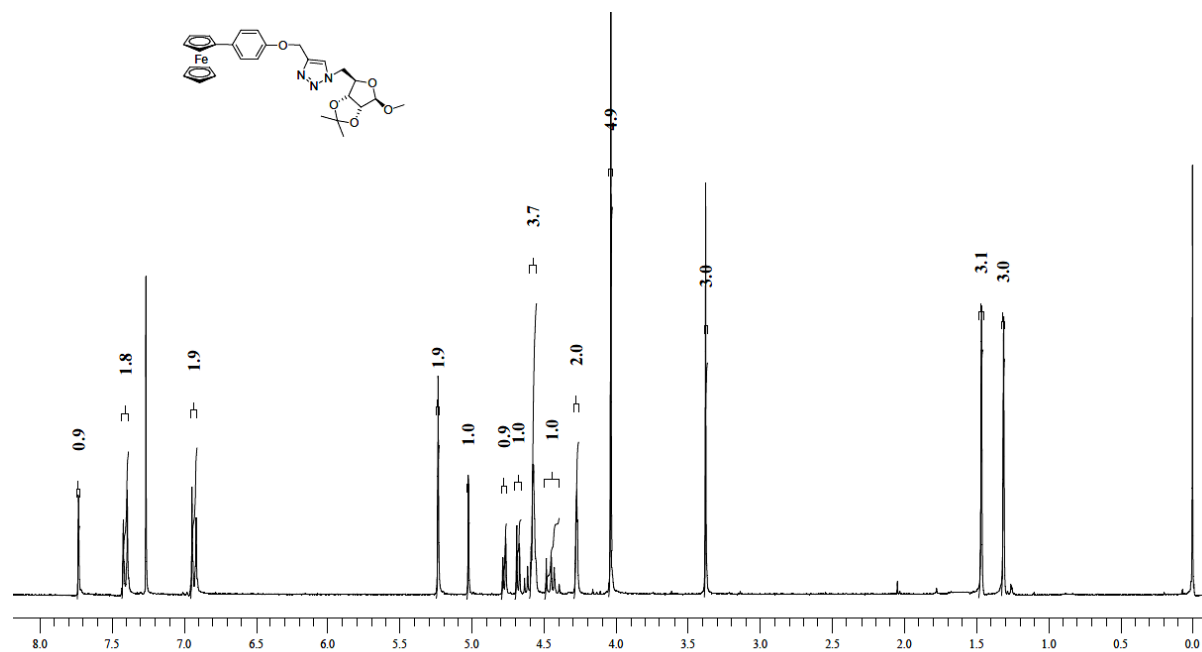

Figure S14:  $^{13}\text{C}$  NMR spectrum of **3f**

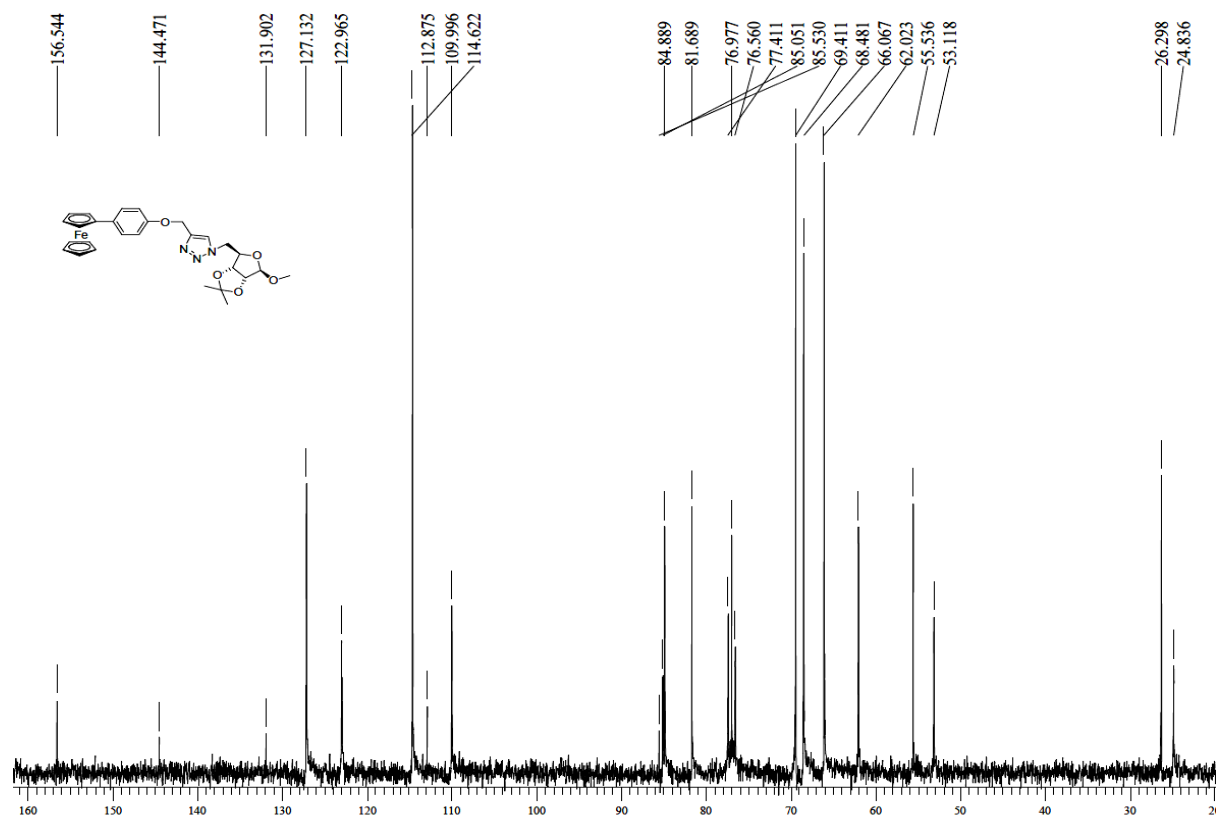

Electronic Supplementary Information (ESI) for the New Journal of Chemistry

Figure S15:  $^1\text{H}$  NMR spectrum of **3g**

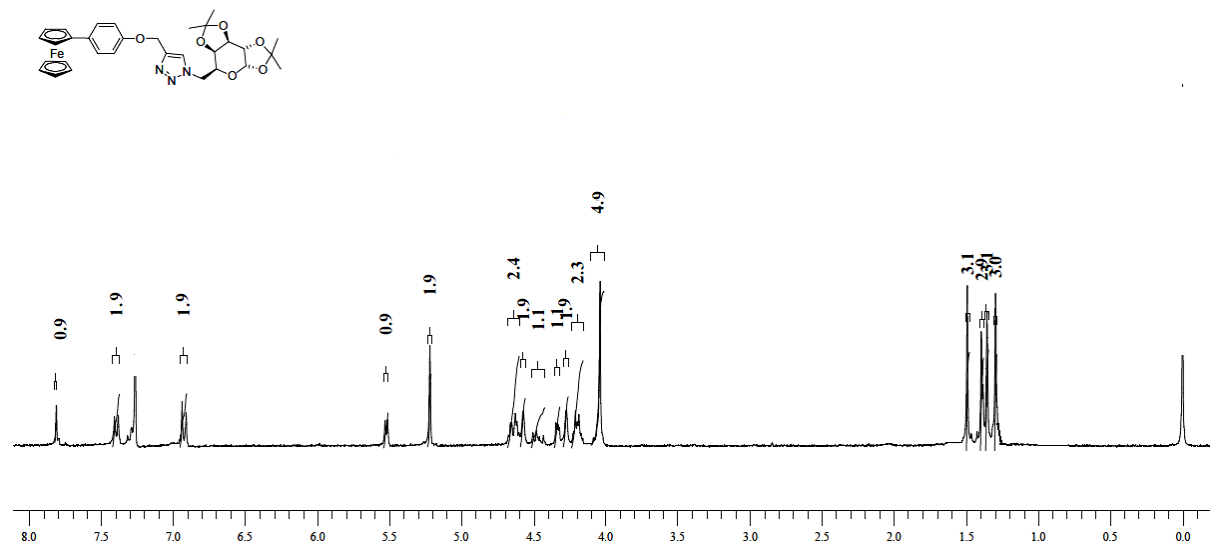

Figure S16:  $^{13}\text{C}$  NMR spectrum of **3g**

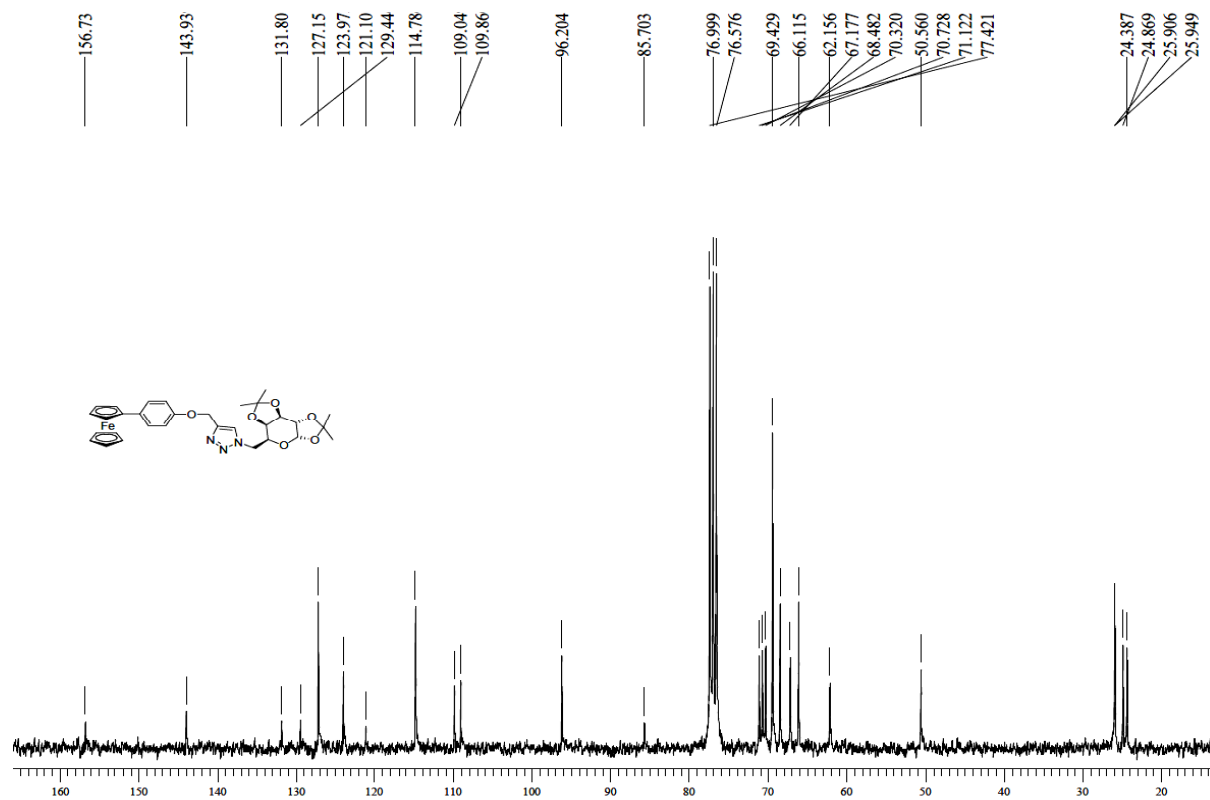

Electronic Supplementary Information (ESI) for the New Journal of Chemistry

Figure S17:  $^1\text{H}$  NMR spectrum of **3h**

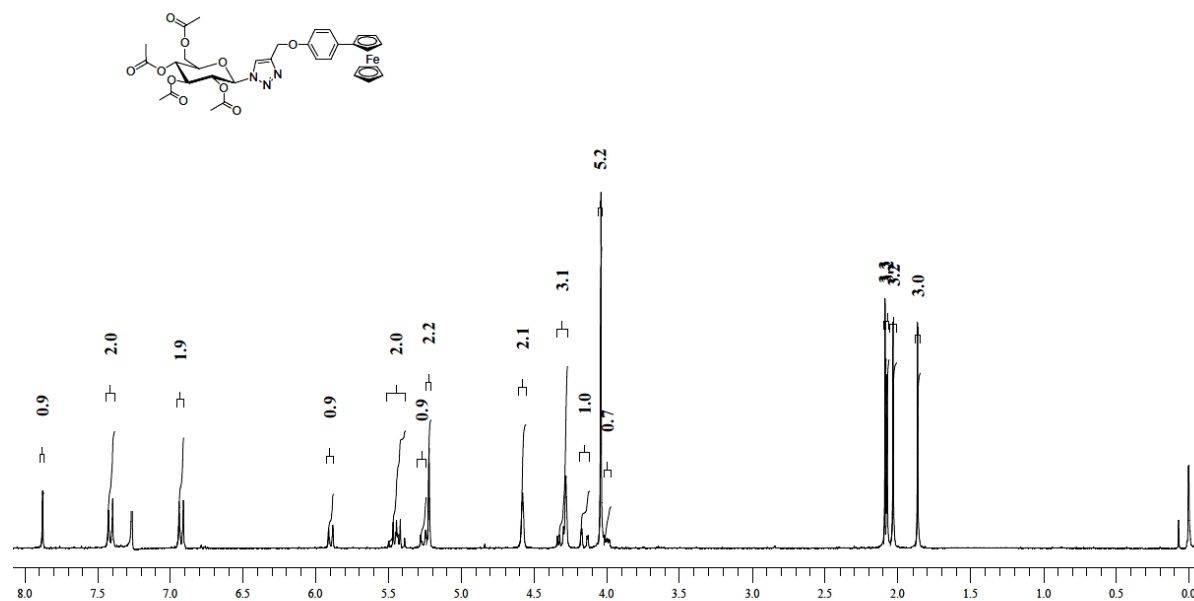

Figure S18:  $^{13}\text{C}$  NMR spectrum of **3h**

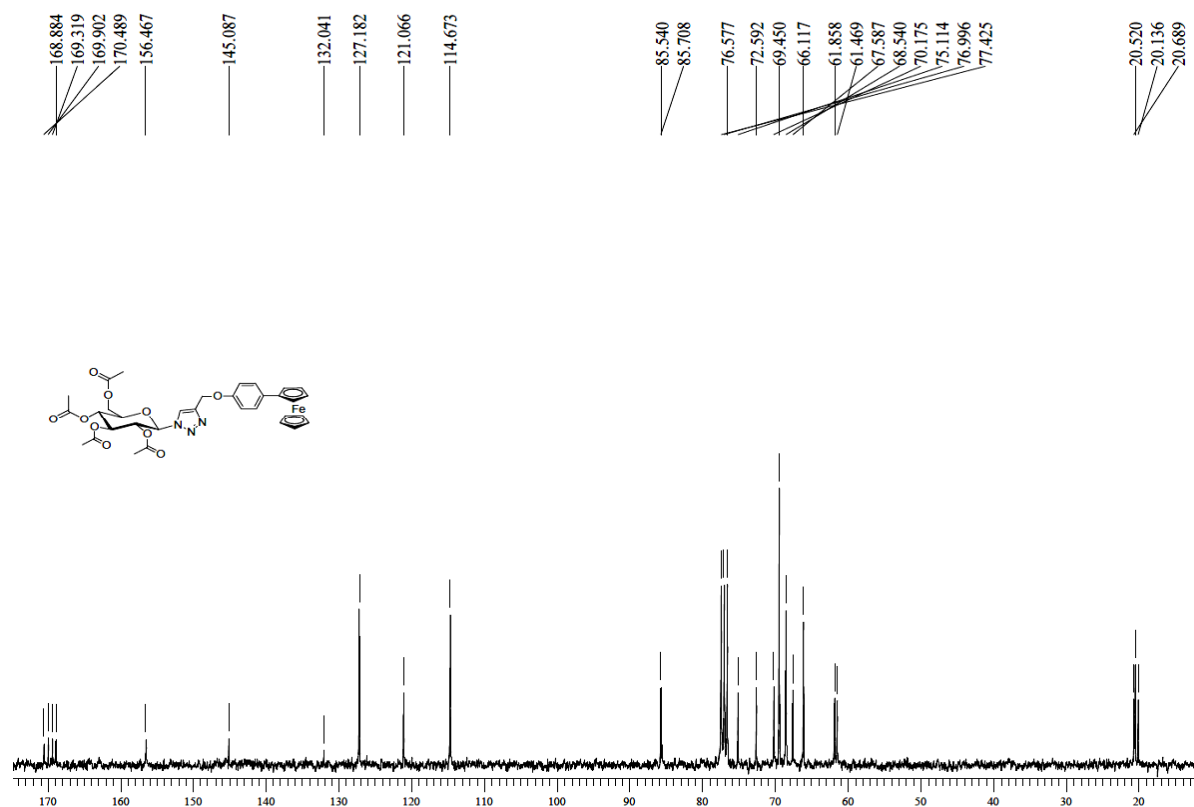

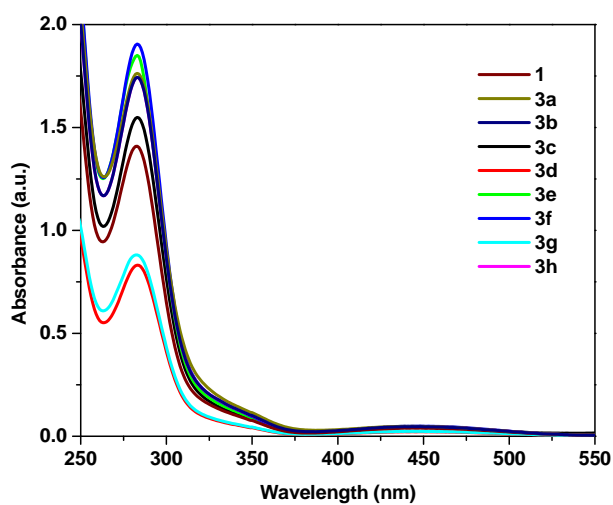

Figure S19: UV-Visible spectra of alkyne (**1**) and ferrocene conjugates **3a-h** in 0.1 mM dichloromethane solution

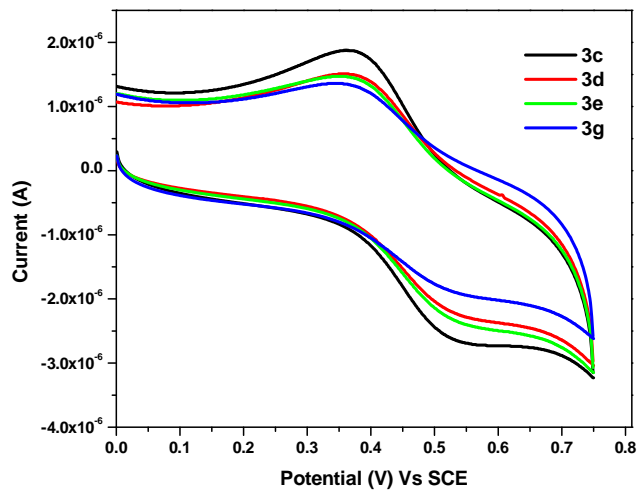

Figure 20: Cyclic voltammograms of ferrocene carbohydrate conjugates **3c**, **3d**, **3e** and **3g** in dichloromethane solution.

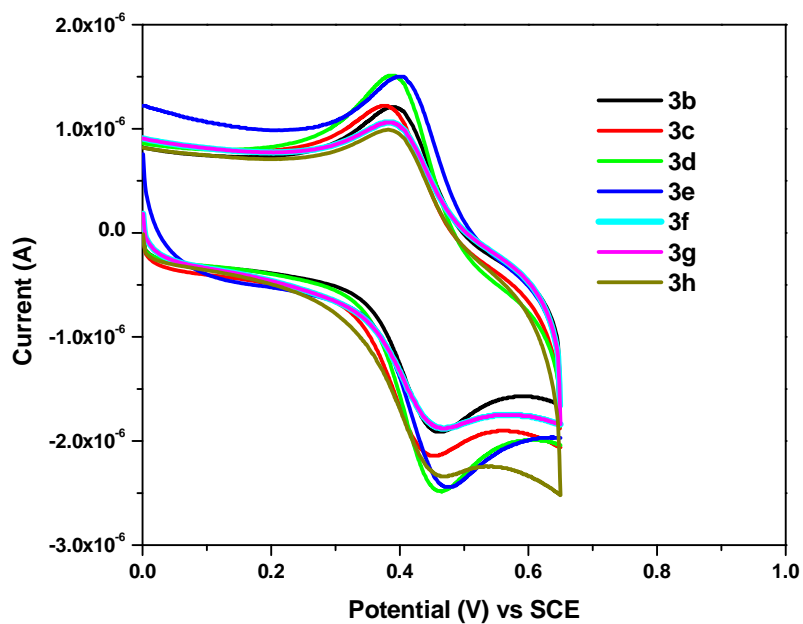

Figure S21: Cyclic voltammograms of ferrocene carbohydrate conjugates in 0.2 mM DMSO solution.

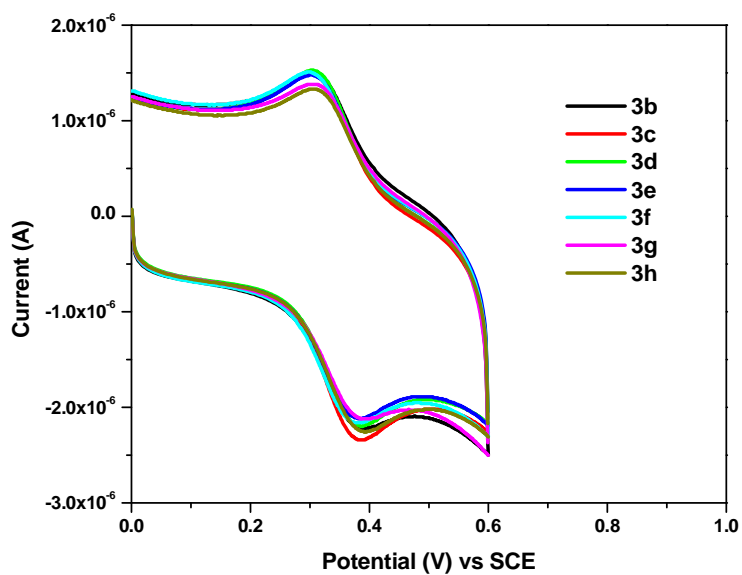

Figure S22: Cyclic voltammograms of ferrocene-carbohydrate conjugates in DMSO and phosphate buffer solution (pH 7.4).

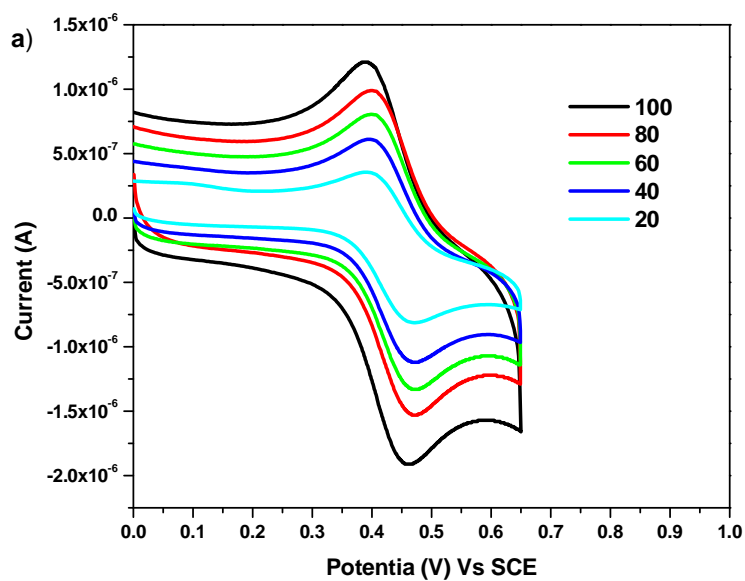

Figure S23: Cyclic voltammograms of **3b** in 0.2 mM DMSO solution at different scan rates at 25 °C

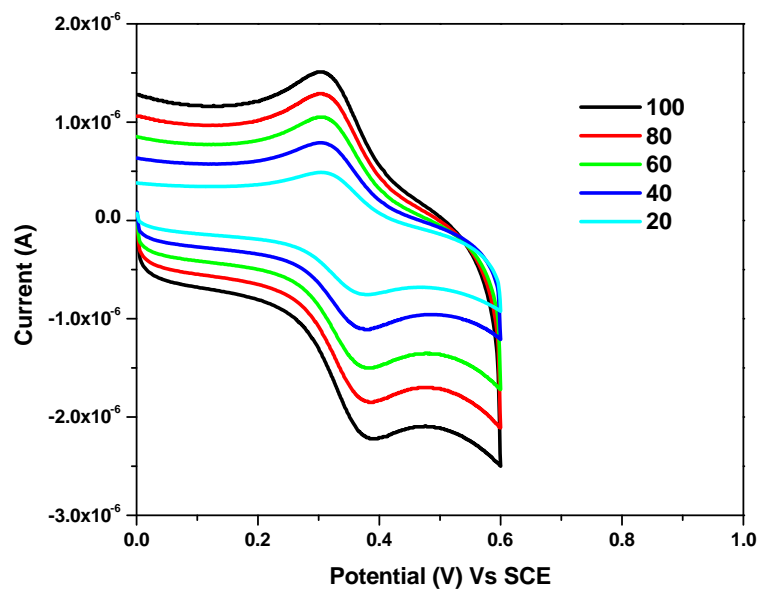

Figure S24: Cyclic voltammograms of **3b** in DMSO and phosphate buffer (2:1) solution at different scan rates at 25 °C

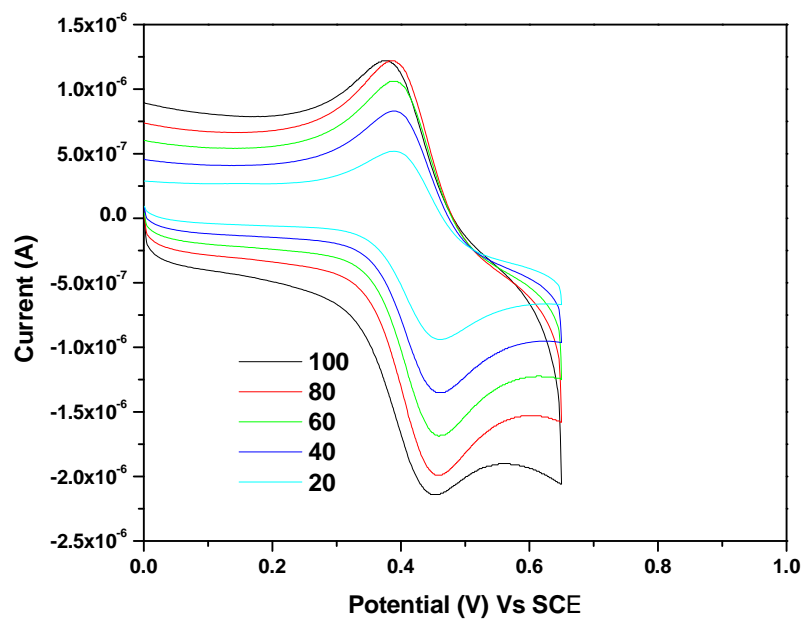

Figure S25: Cyclic voltammograms of **3c** in 0.2 mM DMSO solution at different scan rates at 25 °C

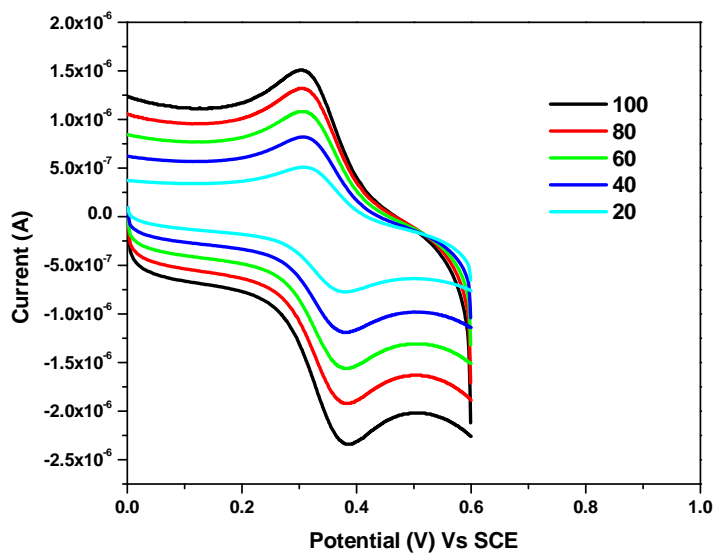

Figure S26: Cyclic voltammograms of **3c** in DMSO and phosphate buffer (2:1) solution at different scan rates at 25 °C



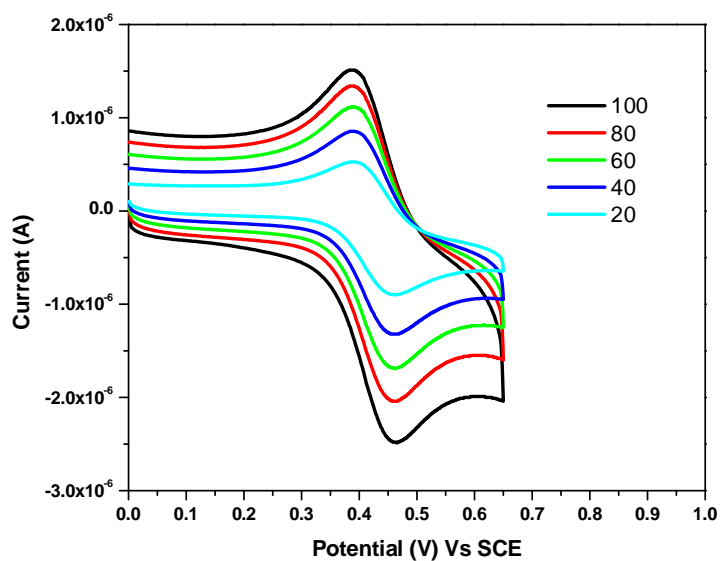

Figure S27: Cyclic voltammograms of **3d** in 0.2 mM DMSO solution at different scan rates at 25 °C

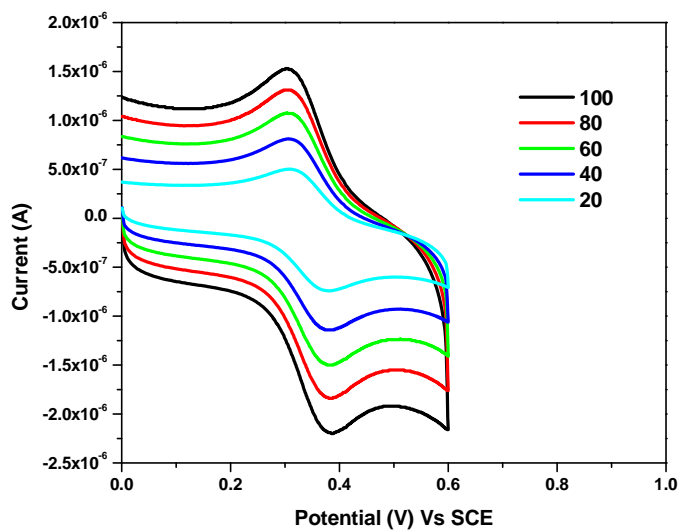

Figure S28: Cyclic voltammograms of **3d** in DMSO and phosphate buffer (2:1) solution at different scan rates at 25 °C

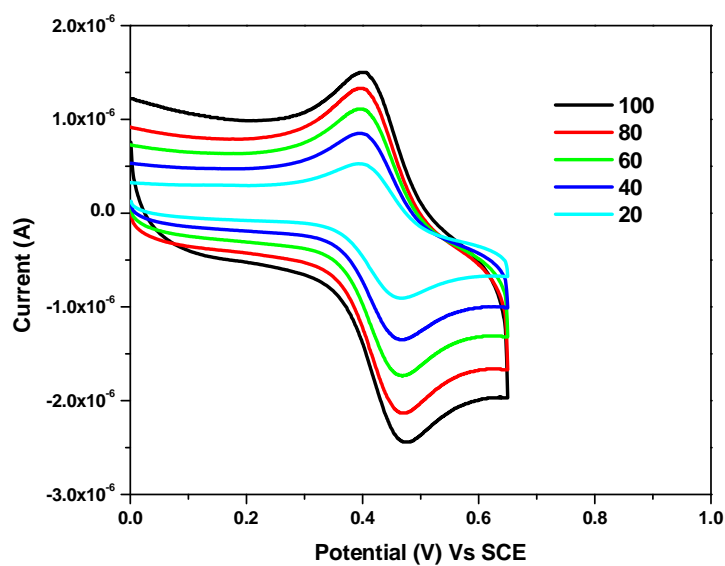

Figure S29: Cyclic voltammograms of **3e** in 0.2 mM DMSO solution at different scan rates at 25 °C

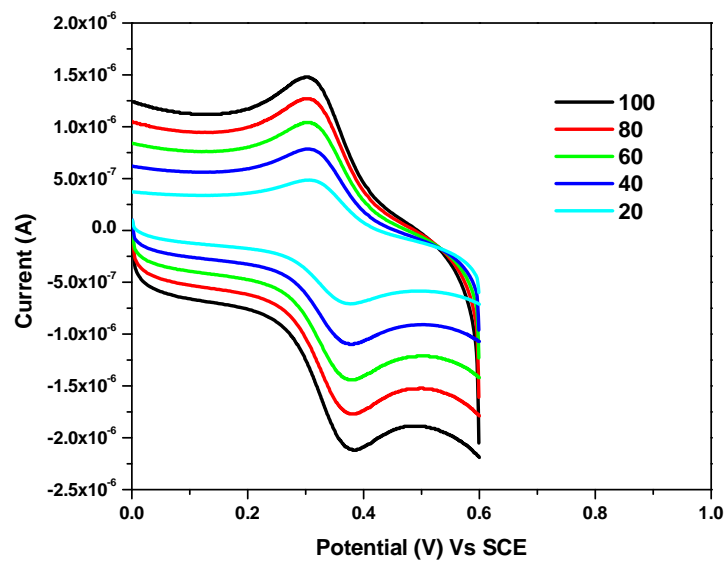

Figure S30: Cyclic voltammograms of **3e** in DMSO and phosphate buffer (2:1) solution at different scan rates at 25 °C

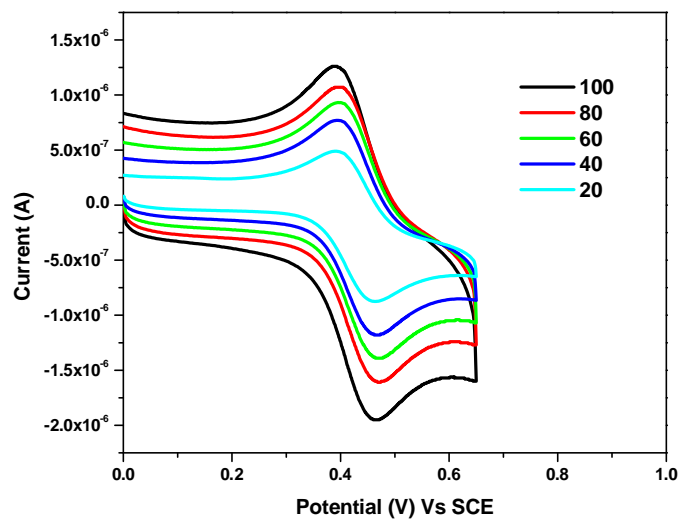

Figure S31: Cyclic voltammograms of **3f** in 0.2 mM DMSO solution at different scan rates at 25 °C

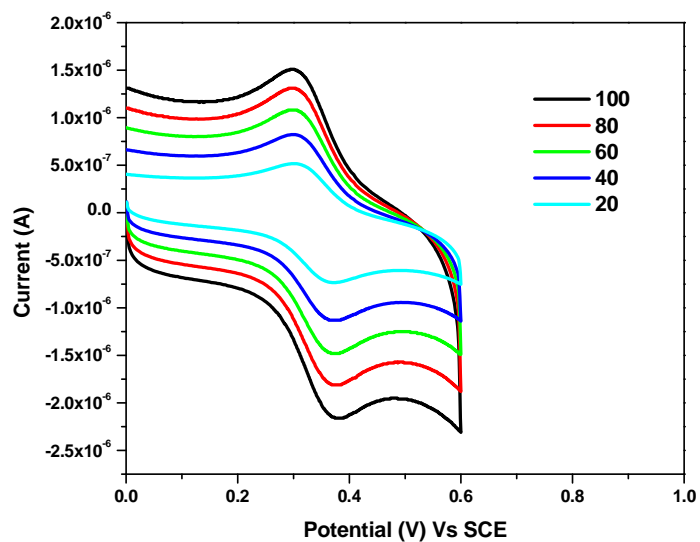

Figure S32: Cyclic voltammograms of **3f** in DMSO and phosphate buffer (2:1) solution at different scan rates at 25 °C

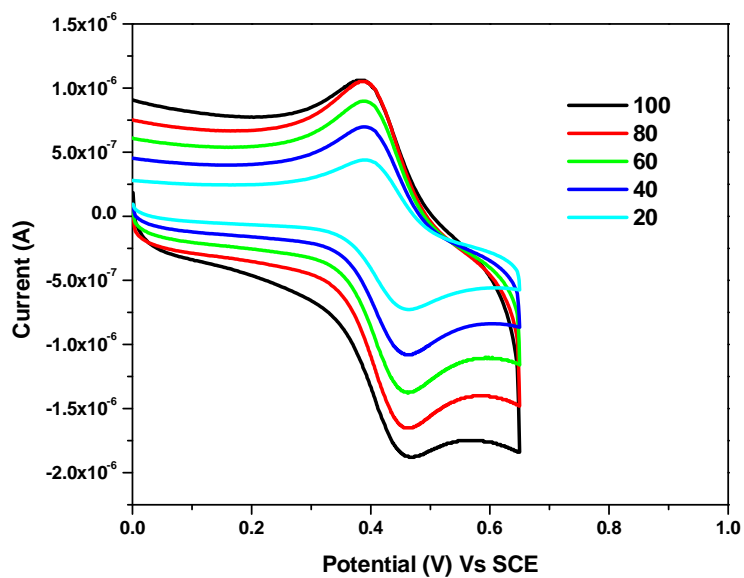

Figure S33: Cyclic voltammograms of **3g** in 0.2 mM DMSO solution at different scan rates at 25 °C

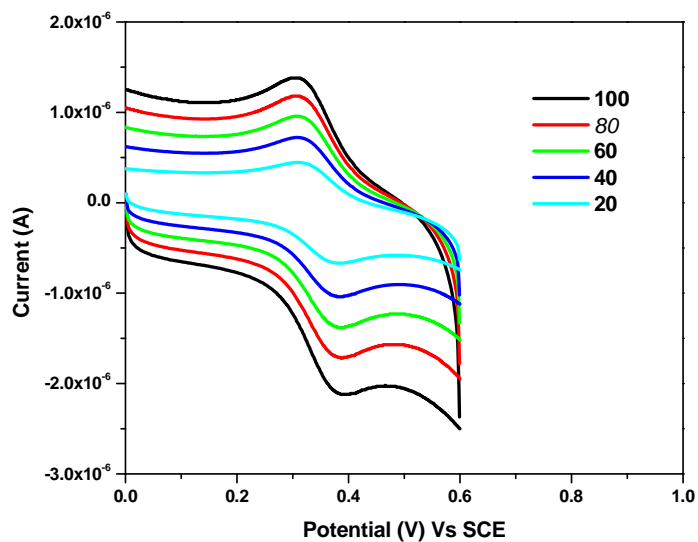

Figure S34: Cyclic voltammograms of **3g** in DMSO and phosphate buffer (2:1) solution at different scan rates at 25 °C

Electronic Supplementary Information (ESI) for the New Journal of Chemistry

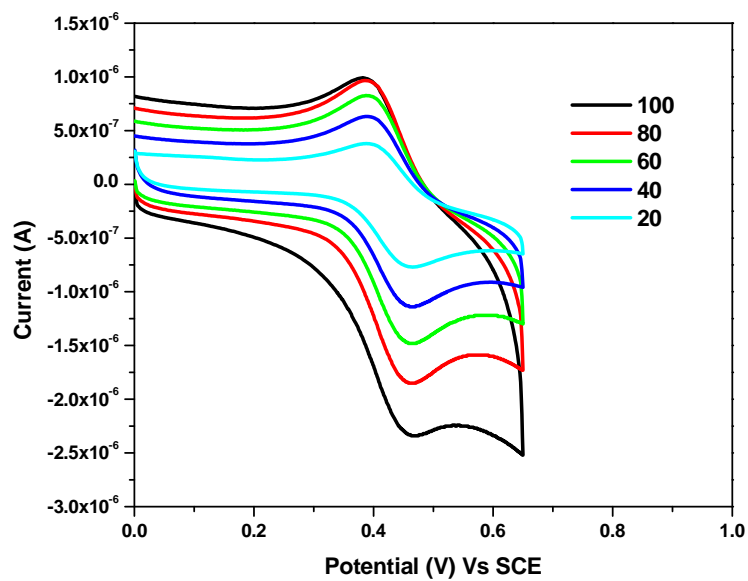

Figure S35: Cyclic voltammograms of **3h** in 0.2 mM DMSO solution at different scan rates at 25 °C

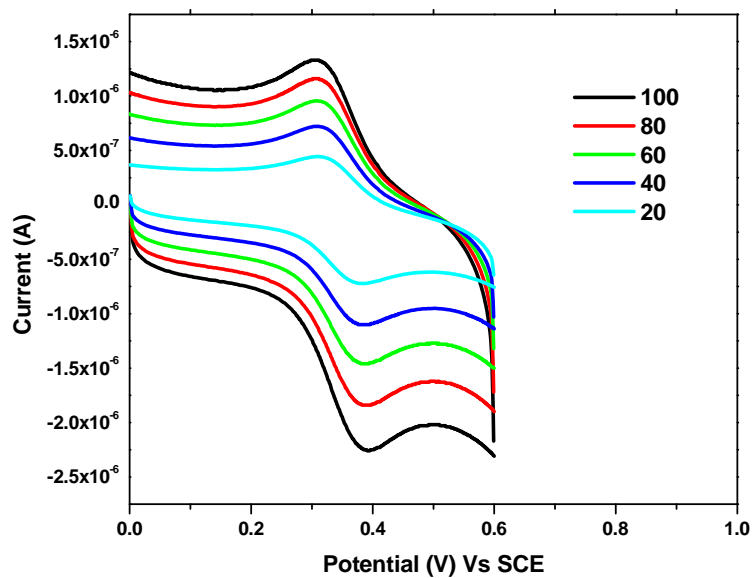

Figure S36: Cyclic voltammograms of **3g** in DMSO and phosphate buffer (2:1) solution at different scan rates at 25 °C

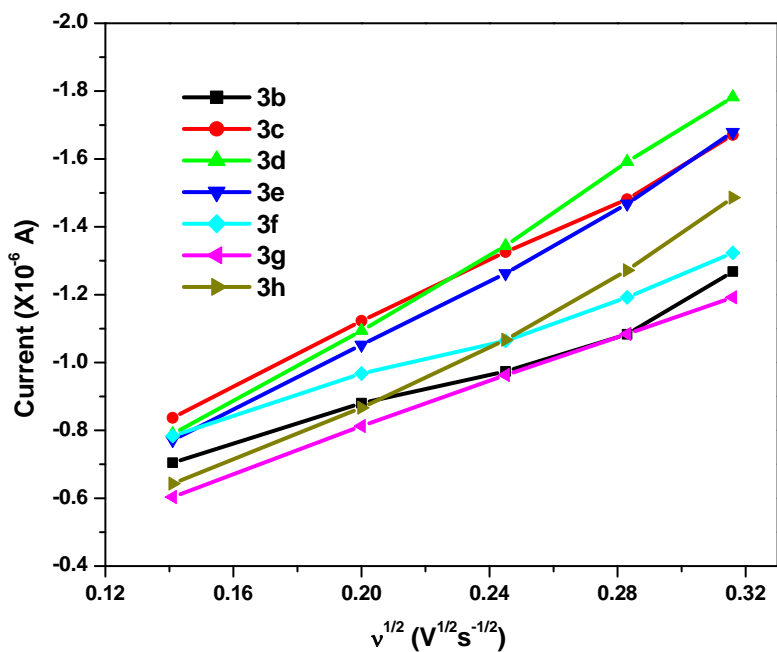

Figure S37: Plot of anodic peak current of ferrocene-carbohydrate conjugates in DMSO solution.

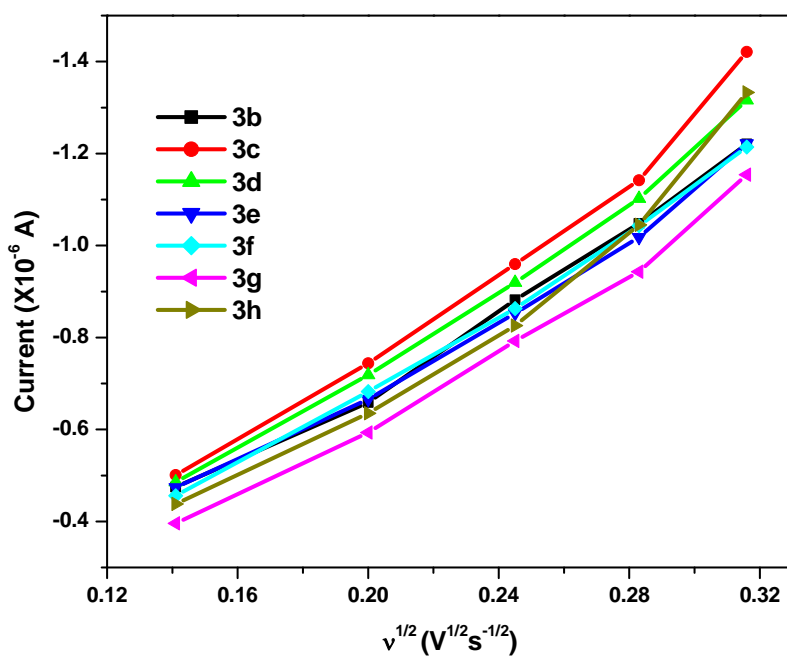

Figure S38: Plot of anodic peak current of ferrocene-carbohydrate conjugates in DMSO-buffer solutions

Electronic Supplementary Information (ESI) for the New Journal of Chemistry

Table S1: Electrochemical data of ferrocene conjugates

| Compound                | $E_{pa}$ (mV) | $E_{pc}$ (mV) | $\Delta E_p$ (mV) | $E_{1/2}$ vs SCE<br>(mV) | $i_a/i_c$ |
|-------------------------|---------------|---------------|-------------------|--------------------------|-----------|
| In DCM                  |               |               |                   |                          |           |
| 1                       | 497           | 370           | 127               | 433                      | 0.88      |
| 3a                      | 539           | 366           | 173               | 452                      | 0.99      |
| 3b                      | 510           | 391           | 119               | 450                      | 0.98      |
| 3c                      | 533           | 370           | 163               | 451                      | 1.02      |
| 3d                      | 548           | 364           | 184               | 456                      | 1.01      |
| 3e                      | 534           | 364           | 170               | 449                      | 0.97      |
| 3f                      | 549           | 372           | 177               | 460                      | 1.00      |
| 3g                      | 536           | 354           | 182               | 445                      | 0.95      |
| 3h                      | 507           | 368           | 139               | 437                      | 0.97      |
| In DMSO                 |               |               |                   |                          |           |
| 3b                      | 466           | 389           | 77                | 428                      | 1.00      |
| 3c                      | 452           | 376           | 76                | 414                      | 0.99      |
| 3d                      | 465           | 388           | 77                | 426                      | 0.98      |
| 3e                      | 484           | 406           | 78                | 445                      | 0.98      |
| 3f                      | 464           | 382           | 82                | 423                      | 1.00      |
| 3g                      | 468           | 382           | 86                | 425                      | 0.99      |
| 3h                      | 477           | 401           | 76                | 439                      | 1.02      |
| In DMSO-buffer solution |               |               |                   |                          |           |
| 3b                      | 390           | 303           | 87                | 347                      | 0.97      |
| 3c                      | 387           | 304           | 83                | 346                      | 0.98      |
| 3d                      | 387           | 302           | 85                | 344                      | 1.03      |
| 3e                      | 385           | 301           | 84                | 343                      | 1.01      |
| 3f                      | 385           | 297           | 82                | 341                      | 0.99      |
| 3g                      | 395           | 305           | 90                | 350                      | 0.99      |
| 3h                      | 393           | 306           | 87                | 349                      | 1.01      |

Table S2: Crystal data and structure refinement for alkyne **1**.

|                                   |                                             |                 |
|-----------------------------------|---------------------------------------------|-----------------|
| Empirical formula                 | C <sub>19</sub> H <sub>16</sub> FeO         |                 |
| Formula weight                    | 316.17                                      |                 |
| Temperature                       | 294(2) K                                    |                 |
| Wavelength                        | 0.71073 Å                                   |                 |
| Crystal system                    | Monoclinic                                  |                 |
| Space group                       | P2 <sub>1</sub> /c                          |                 |
| Unit cell dimensions              | a = 17.913(2) Å                             | α = 90°.        |
|                                   | b = 9.5455(12) Å                            | β = 99.613(2)°. |
|                                   | c = 8.8695(11) Å                            | γ = 90°.        |
| Volume                            | 1495.3(3) Å <sup>3</sup>                    |                 |
| Z                                 | 4                                           |                 |
| Density (calculated)              | 1.404 Mg/m <sup>3</sup>                     |                 |
| Absorption coefficient            | 1.003 mm <sup>-1</sup>                      |                 |
| F(000)                            | 656                                         |                 |
| Crystal size                      | 0.11 x 0.06 x 0.04 mm <sup>3</sup>          |                 |
| θ range for data collection       | 2.31 to 25.00°.                             |                 |
| Index ranges                      | -21 ≤ h ≤ 21, -11 ≤ k ≤ 11, -10 ≤ l ≤ 10    |                 |
| Reflections collected             | 12814                                       |                 |
| Independent reflections           | 2628 [R(int) = 0.0244]                      |                 |
| Completeness to θ = 25.00°        | 99.7 %                                      |                 |
| Refinement method                 | Full-matrix least-squares on F <sup>2</sup> |                 |
| Data / restraints / parameters    | 2628 / 0 / 190                              |                 |
| Goodness-of-fit on F <sup>2</sup> | 1.037                                       |                 |
| Final R indices [I > 2σ(I)]       | R1 = 0.0309, wR2 = 0.0808                   |                 |
| R indices (all data)              | R1 = 0.0360, wR2 = 0.0842                   |                 |
| Largest diff. peak and hole       | 0.300 and -0.166 e.Å <sup>-3</sup>          |                 |



Table S3: Atomic coordinates ( $\times 10^4$ ) and equivalent isotropic displacement parameters ( $\text{\AA}^2 \times 10^3$ ) for alkyne **1**.  $U(\text{eq})$  is defined as one third of the trace of the orthogonalized  $U^{ij}$  tensor.

|       | x       | y       | z        | U(eq)  |
|-------|---------|---------|----------|--------|
| C(1)  | -862(2) | 5757(4) | -1379(4) | 109(1) |
| C(2)  | -537(1) | 6136(3) | -2314(3) | 80(1)  |
| C(3)  | -122(2) | 6566(3) | -3510(3) | 90(1)  |
| C(4)  | 1139(1) | 5844(3) | -2411(3) | 71(1)  |
| C(5)  | 1239(1) | 6918(3) | -1364(3) | 68(1)  |
| C(6)  | 1911(1) | 6996(2) | -339(2)  | 61(1)  |
| C(7)  | 2483(1) | 6031(2) | -328(2)  | 54(1)  |
| C(8)  | 2352(2) | 4942(2) | -1367(3) | 70(1)  |
| C(9)  | 1689(2) | 4854(3) | -2392(3) | 79(1)  |
| C(10) | 3651(2) | 3040(2) | 2987(3)  | 78(1)  |
| C(11) | 2922(2) | 3582(3) | 2916(4)  | 100(1) |
| C(12) | 2958(3) | 4556(4) | 4104(6)  | 126(2) |
| C(13) | 3696(3) | 4605(3) | 4860(4)  | 106(1) |
| C(14) | 4113(2) | 3677(3) | 4183(3)  | 81(1)  |
| C(15) | 3220(1) | 6193(2) | 673(2)   | 54(1)  |
| C(16) | 3899(1) | 5477(3) | 523(3)   | 64(1)  |
| C(17) | 4486(1) | 5978(3) | 1666(3)  | 72(1)  |
| C(18) | 4177(1) | 6999(2) | 2526(3)  | 71(1)  |
| C(19) | 3399(1) | 7127(2) | 1928(2)  | 60(1)  |
| Fe(1) | 3646(1) | 5127(1) | 2633(1)  | 53(1)  |
| O(1)  | 522(1)  | 5703(3) | -3550(2) | 98(1)  |

Electronic Supplementary Information (ESI) for the New Journal of Chemistry

Table S4: Bond lengths [ $\text{\AA}$ ] and angles [ $^\circ$ ] for alkyne **1**

---

|             |          |
|-------------|----------|
| C(1)-C(2)   | 1.149(4) |
| C(1)-H(1)   | 0.9300   |
| C(2)-C(3)   | 1.452(4) |
| C(3)-O(1)   | 1.423(3) |
| C(3)-H(3A)  | 0.9700   |
| C(3)-H(3B)  | 0.9700   |
| C(4)-C(9)   | 1.365(4) |
| C(4)-O(1)   | 1.373(3) |
| C(4)-C(5)   | 1.374(3) |
| C(5)-C(6)   | 1.384(3) |
| C(5)-H(5)   | 0.9300   |
| C(6)-C(7)   | 1.377(3) |
| C(6)-H(6)   | 0.9300   |
| C(7)-C(8)   | 1.383(3) |
| C(7)-C(15)  | 1.470(3) |
| C(8)-C(9)   | 1.371(4) |
| C(8)-H(8)   | 0.9300   |
| C(9)-H(9)   | 0.9300   |
| C(10)-C(14) | 1.373(4) |
| C(10)-C(11) | 1.397(4) |
| C(10)-Fe(1) | 2.016(2) |
| C(10)-H(10) | 0.9800   |
| C(11)-C(12) | 1.399(5) |
| C(11)-Fe(1) | 2.008(2) |
| C(11)-H(11) | 0.9800   |
| C(12)-C(13) | 1.380(6) |
| C(12)-Fe(1) | 2.014(3) |
| C(12)-H(12) | 0.9800   |
| C(13)-C(14) | 1.361(4) |
| C(13)-Fe(1) | 2.025(3) |
| C(13)-H(13) | 0.9800   |
| C(14)-Fe(1) | 2.030(2) |
| C(14)-H(14) | 0.9800   |
| C(15)-C(19) | 1.421(3) |
| C(15)-C(16) | 1.421(3) |
| C(15)-Fe(1) | 2.049(2) |

Electronic Supplementary Information (ESI) for the New Journal of Chemistry

|             |            |
|-------------|------------|
| C(16)-C(17) | 1.416(3)   |
| C(16)-Fe(1) | 2.025(2)   |
| C(16)-H(16) | 0.9800     |
| C(17)-C(18) | 1.407(3)   |
| C(17)-Fe(1) | 2.023(2)   |
| C(17)-H(17) | 0.9800     |
| C(18)-C(19) | 1.411(3)   |
| C(18)-Fe(1) | 2.035(2)   |
| C(18)-H(18) | 0.9800     |
| C(19)-Fe(1) | 2.0340(19) |
| C(19)-H(19) | 0.9800     |

|                  |            |
|------------------|------------|
| C(2)-C(1)-H(1)   | 180.0      |
| C(1)-C(2)-C(3)   | 178.1(4)   |
| O(1)-C(3)-C(2)   | 111.8(2)   |
| O(1)-C(3)-H(3A)  | 109.3      |
| C(2)-C(3)-H(3A)  | 109.3      |
| O(1)-C(3)-H(3B)  | 109.3      |
| C(2)-C(3)-H(3B)  | 109.3      |
| H(3A)-C(3)-H(3B) | 107.9      |
| C(9)-C(4)-O(1)   | 115.6(2)   |
| C(9)-C(4)-C(5)   | 119.7(2)   |
| O(1)-C(4)-C(5)   | 124.7(2)   |
| C(4)-C(5)-C(6)   | 119.0(2)   |
| C(4)-C(5)-H(5)   | 120.5      |
| C(6)-C(5)-H(5)   | 120.5      |
| C(7)-C(6)-C(5)   | 122.2(2)   |
| C(7)-C(6)-H(6)   | 118.9      |
| C(5)-C(6)-H(6)   | 118.9      |
| C(6)-C(7)-C(8)   | 117.0(2)   |
| C(6)-C(7)-C(15)  | 121.71(18) |
| C(8)-C(7)-C(15)  | 121.14(19) |
| C(9)-C(8)-C(7)   | 121.3(2)   |
| C(9)-C(8)-H(8)   | 119.3      |
| C(7)-C(8)-H(8)   | 119.3      |
| C(4)-C(9)-C(8)   | 120.6(2)   |
| C(4)-C(9)-H(9)   | 119.7      |
| C(8)-C(9)-H(9)   | 119.7      |

Electronic Supplementary Information (ESI) for the New Journal of Chemistry

|                   |            |
|-------------------|------------|
| C(14)-C(10)-C(11) | 108.0(3)   |
| C(14)-C(10)-Fe(1) | 70.72(14)  |
| C(11)-C(10)-Fe(1) | 69.36(14)  |
| C(14)-C(10)-H(10) | 126.0      |
| C(11)-C(10)-H(10) | 126.0      |
| Fe(1)-C(10)-H(10) | 126.0      |
| C(10)-C(11)-C(12) | 106.7(3)   |
| C(10)-C(11)-Fe(1) | 70.02(14)  |
| C(12)-C(11)-Fe(1) | 69.89(17)  |
| C(10)-C(11)-H(11) | 126.6      |
| C(12)-C(11)-H(11) | 126.6      |
| Fe(1)-C(11)-H(11) | 126.6      |
| C(13)-C(12)-C(11) | 108.0(3)   |
| C(13)-C(12)-Fe(1) | 70.45(18)  |
| C(11)-C(12)-Fe(1) | 69.41(16)  |
| C(13)-C(12)-H(12) | 126.0      |
| C(11)-C(12)-H(12) | 126.0      |
| Fe(1)-C(12)-H(12) | 126.0      |
| C(14)-C(13)-C(12) | 108.4(3)   |
| C(14)-C(13)-Fe(1) | 70.61(16)  |
| C(12)-C(13)-Fe(1) | 69.59(19)  |
| C(14)-C(13)-H(13) | 125.8      |
| C(12)-C(13)-H(13) | 125.8      |
| Fe(1)-C(13)-H(13) | 125.8      |
| C(13)-C(14)-C(10) | 109.0(3)   |
| C(13)-C(14)-Fe(1) | 70.18(17)  |
| C(10)-C(14)-Fe(1) | 69.61(14)  |
| C(13)-C(14)-H(14) | 125.5      |
| C(10)-C(14)-H(14) | 125.5      |
| Fe(1)-C(14)-H(14) | 125.5      |
| C(19)-C(15)-C(16) | 106.81(19) |
| C(19)-C(15)-C(7)  | 127.02(18) |
| C(16)-C(15)-C(7)  | 126.12(18) |
| C(19)-C(15)-Fe(1) | 69.08(11)  |
| C(16)-C(15)-Fe(1) | 68.70(12)  |
| C(7)-C(15)-Fe(1)  | 129.03(13) |
| C(17)-C(16)-C(15) | 108.4(2)   |
| C(17)-C(16)-Fe(1) | 69.44(13)  |

Electronic Supplementary Information (ESI) for the New Journal of Chemistry

|                   |            |
|-------------------|------------|
| C(15)-C(16)-Fe(1) | 70.47(11)  |
| C(17)-C(16)-H(16) | 125.8      |
| C(15)-C(16)-H(16) | 125.8      |
| Fe(1)-C(16)-H(16) | 125.8      |
| C(18)-C(17)-C(16) | 108.0(2)   |
| C(18)-C(17)-Fe(1) | 70.15(12)  |
| C(16)-C(17)-Fe(1) | 69.61(12)  |
| C(18)-C(17)-H(17) | 126.0      |
| C(16)-C(17)-H(17) | 126.0      |
| Fe(1)-C(17)-H(17) | 126.0      |
| C(17)-C(18)-C(19) | 108.0(2)   |
| C(17)-C(18)-Fe(1) | 69.27(13)  |
| C(19)-C(18)-Fe(1) | 69.69(11)  |
| C(17)-C(18)-H(18) | 126.0      |
| C(19)-C(18)-H(18) | 126.0      |
| Fe(1)-C(18)-H(18) | 126.0      |
| C(18)-C(19)-C(15) | 108.71(19) |
| C(18)-C(19)-Fe(1) | 69.73(12)  |
| C(15)-C(19)-Fe(1) | 70.19(11)  |
| C(18)-C(19)-H(19) | 125.6      |
| C(15)-C(19)-H(19) | 125.6      |
| Fe(1)-C(19)-H(19) | 125.6      |
| C(11)-Fe(1)-C(12) | 40.70(15)  |
| C(11)-Fe(1)-C(10) | 40.62(11)  |
| C(12)-Fe(1)-C(10) | 67.61(12)  |
| C(11)-Fe(1)-C(17) | 152.89(14) |
| C(12)-Fe(1)-C(17) | 164.28(19) |
| C(10)-Fe(1)-C(17) | 118.56(11) |
| C(11)-Fe(1)-C(13) | 67.75(15)  |
| C(12)-Fe(1)-C(13) | 39.96(16)  |
| C(10)-Fe(1)-C(13) | 66.83(12)  |
| C(17)-Fe(1)-C(13) | 126.70(16) |
| C(11)-Fe(1)-C(16) | 119.07(13) |
| C(12)-Fe(1)-C(16) | 154.03(19) |
| C(10)-Fe(1)-C(16) | 108.10(10) |
| C(17)-Fe(1)-C(16) | 40.94(9)   |
| C(13)-Fe(1)-C(16) | 164.07(15) |
| C(11)-Fe(1)-C(14) | 67.41(11)  |

Electronic Supplementary Information (ESI) for the New Journal of Chemistry

|                   |            |
|-------------------|------------|
| C(12)-Fe(1)-C(14) | 66.67(14)  |
| C(10)-Fe(1)-C(14) | 39.67(10)  |
| C(17)-Fe(1)-C(14) | 108.03(11) |
| C(13)-Fe(1)-C(14) | 39.21(12)  |
| C(16)-Fe(1)-C(14) | 127.41(11) |
| C(11)-Fe(1)-C(19) | 128.05(11) |
| C(12)-Fe(1)-C(19) | 109.17(11) |
| C(10)-Fe(1)-C(19) | 165.96(10) |
| C(17)-Fe(1)-C(19) | 68.38(10)  |
| C(13)-Fe(1)-C(19) | 120.20(11) |
| C(16)-Fe(1)-C(19) | 68.41(9)   |
| C(14)-Fe(1)-C(19) | 153.09(10) |
| C(11)-Fe(1)-C(18) | 165.55(13) |
| C(12)-Fe(1)-C(18) | 127.57(16) |
| C(10)-Fe(1)-C(18) | 152.25(11) |
| C(17)-Fe(1)-C(18) | 40.59(10)  |
| C(13)-Fe(1)-C(18) | 108.48(13) |
| C(16)-Fe(1)-C(18) | 68.49(10)  |
| C(14)-Fe(1)-C(18) | 119.18(11) |
| C(19)-Fe(1)-C(18) | 40.58(9)   |
| C(11)-Fe(1)-C(15) | 108.31(10) |
| C(12)-Fe(1)-C(15) | 120.18(15) |
| C(10)-Fe(1)-C(15) | 127.88(10) |
| C(17)-Fe(1)-C(15) | 68.83(9)   |
| C(13)-Fe(1)-C(15) | 154.13(13) |
| C(16)-Fe(1)-C(15) | 40.83(8)   |
| C(14)-Fe(1)-C(15) | 165.07(10) |
| C(19)-Fe(1)-C(15) | 40.73(8)   |
| C(18)-Fe(1)-C(15) | 68.60(9)   |
| C(4)-O(1)-C(3)    | 118.7(2)   |

---

Symmetry transformations used to generate equivalent atoms:

Table S5: Anisotropic displacement parameters ( $\text{\AA}^2 \times 10^3$ ) for alkyne **1**. The anisotropic displacement factor exponent takes the form:  $-2\pi^2 [h^2 a^{*2} U^{11} + \dots + 2 h k a^* b^* U^{12}]$

|       | U <sup>11</sup> | U <sup>22</sup> | U <sup>33</sup> | U <sup>23</sup> | U <sup>13</sup> | U <sup>12</sup> |
|-------|-----------------|-----------------|-----------------|-----------------|-----------------|-----------------|
| C(1)  | 85(2)           | 115(3)          | 124(3)          | 23(2)           | 13(2)           | -12(2)          |
| C(2)  | 65(2)           | 78(2)           | 90(2)           | 9(1)            | -6(1)           | -3(1)           |
| C(3)  | 83(2)           | 105(2)          | 75(2)           | 14(2)           | -5(1)           | 8(2)            |
| C(4)  | 68(1)           | 83(2)           | 60(1)           | -3(1)           | 11(1)           | -1(1)           |
| C(5)  | 64(1)           | 67(1)           | 74(1)           | 2(1)            | 20(1)           | 8(1)            |
| C(6)  | 65(1)           | 54(1)           | 67(1)           | -6(1)           | 23(1)           | -4(1)           |
| C(7)  | 63(1)           | 48(1)           | 55(1)           | 1(1)            | 22(1)           | -4(1)           |
| C(8)  | 73(2)           | 59(1)           | 78(2)           | -14(1)          | 14(1)           | 7(1)            |
| C(9)  | 86(2)           | 74(2)           | 74(2)           | -22(1)          | 8(1)            | 1(1)            |
| C(10) | 107(2)          | 40(1)           | 91(2)           | 7(1)            | 31(2)           | 6(1)            |
| C(11) | 69(2)           | 81(2)           | 143(3)          | 55(2)           | 1(2)            | -24(2)          |
| C(12) | 151(3)          | 80(2)           | 180(4)          | 65(3)           | 125(3)          | 49(2)           |
| C(13) | 189(4)          | 68(2)           | 72(2)           | 9(1)            | 52(2)           | 5(2)            |
| C(14) | 84(2)           | 71(2)           | 86(2)           | 23(1)           | 8(1)            | 4(1)            |
| C(15) | 61(1)           | 47(1)           | 58(1)           | 2(1)            | 22(1)           | -5(1)           |
| C(16) | 63(1)           | 70(1)           | 65(1)           | -1(1)           | 30(1)           | -6(1)           |
| C(17) | 59(1)           | 79(2)           | 82(2)           | 8(1)            | 21(1)           | -13(1)          |
| C(18) | 81(2)           | 56(1)           | 74(2)           | 4(1)            | 8(1)            | -20(1)          |
| C(19) | 78(1)           | 40(1)           | 62(1)           | 3(1)            | 15(1)           | -4(1)           |
| Fe(1) | 59(1)           | 43(1)           | 62(1)           | 2(1)            | 21(1)           | 1(1)            |
| O(1)  | 81(1)           | 133(2)          | 76(1)           | -19(1)          | -3(1)           | 12(1)           |

Electronic Supplementary Information (ESI) for the New Journal of Chemistry

Table S6: Hydrogen coordinates ( $\times 10^4$ ) and isotropic displacement parameters ( $\text{\AA}^2 \times 10^3$ ) for alkyne **1**.

|       | x     | y    | z     | U(eq) |
|-------|-------|------|-------|-------|
| H(1)  | -1126 | 5451 | -622  | 130   |
| H(3A) | -454  | 6519 | -4491 | 108   |
| H(3B) | 41    | 7530 | -3337 | 108   |
| H(5)  | 861   | 7582 | -1344 | 81    |
| H(6)  | 1979  | 7726 | 365   | 73    |
| H(8)  | 2720  | 4256 | -1371 | 84    |
| H(9)  | 1615  | 4112 | -3080 | 94    |
| H(10) | 3805  | 2324 | 2309  | 93    |
| H(11) | 2469  | 3307 | 2197  | 120   |
| H(12) | 2533  | 5103 | 4359  | 151   |
| H(13) | 3887  | 5202 | 5739  | 127   |
| H(14) | 4656  | 3503 | 4489  | 97    |
| H(16) | 3952  | 4757 | -239  | 77    |
| H(17) | 5015  | 5669 | 1827  | 86    |
| H(18) | 4452  | 7522 | 3396  | 85    |
| H(19) | 3041  | 7751 | 2319  | 72    |



Table S7: Torsion angles [°] for alkyne **1**.

---

|                         |            |
|-------------------------|------------|
| C(1)-C(2)-C(3)-O(1)     | -42(9)     |
| C(9)-C(4)-C(5)-C(6)     | 2.1(4)     |
| O(1)-C(4)-C(5)-C(6)     | -175.4(2)  |
| C(4)-C(5)-C(6)-C(7)     | -0.3(3)    |
| C(5)-C(6)-C(7)-C(8)     | -1.7(3)    |
| C(5)-C(6)-C(7)-C(15)    | 174.51(19) |
| C(6)-C(7)-C(8)-C(9)     | 1.8(4)     |
| C(15)-C(7)-C(8)-C(9)    | -174.4(2)  |
| O(1)-C(4)-C(9)-C(8)     | 175.8(2)   |
| C(5)-C(4)-C(9)-C(8)     | -1.9(4)    |
| C(7)-C(8)-C(9)-C(4)     | -0.1(4)    |
| C(14)-C(10)-C(11)-C(12) | -0.2(3)    |
| Fe(1)-C(10)-C(11)-C(12) | -60.61(18) |
| C(14)-C(10)-C(11)-Fe(1) | 60.44(17)  |
| C(10)-C(11)-C(12)-C(13) | 0.5(3)     |
| Fe(1)-C(11)-C(12)-C(13) | -60.2(2)   |
| C(10)-C(11)-C(12)-Fe(1) | 60.69(18)  |
| C(11)-C(12)-C(13)-C(14) | -0.7(3)    |
| Fe(1)-C(12)-C(13)-C(14) | -60.2(2)   |
| C(11)-C(12)-C(13)-Fe(1) | 59.5(2)    |
| C(12)-C(13)-C(14)-C(10) | 0.6(3)     |
| Fe(1)-C(13)-C(14)-C(10) | -58.96(19) |
| C(12)-C(13)-C(14)-Fe(1) | 59.6(2)    |
| C(11)-C(10)-C(14)-C(13) | -0.3(3)    |
| Fe(1)-C(10)-C(14)-C(13) | 59.31(19)  |
| C(11)-C(10)-C(14)-Fe(1) | -59.59(17) |
| C(6)-C(7)-C(15)-C(19)   | 13.7(3)    |
| C(8)-C(7)-C(15)-C(19)   | -170.3(2)  |
| C(6)-C(7)-C(15)-C(16)   | -163.6(2)  |
| C(8)-C(7)-C(15)-C(16)   | 12.5(3)    |
| C(6)-C(7)-C(15)-Fe(1)   | 105.7(2)   |
| C(8)-C(7)-C(15)-Fe(1)   | -78.3(3)   |
| C(19)-C(15)-C(16)-C(17) | -0.5(2)    |
| C(7)-C(15)-C(16)-C(17)  | 177.20(18) |
| Fe(1)-C(15)-C(16)-C(17) | -59.28(15) |
| C(19)-C(15)-C(16)-Fe(1) | 58.79(13)  |

Electronic Supplementary Information (ESI) for the New Journal of Chemistry

|                         |             |
|-------------------------|-------------|
| C(7)-C(15)-C(16)-Fe(1)  | -123.52(19) |
| C(15)-C(16)-C(17)-C(18) | 0.1(3)      |
| Fe(1)-C(16)-C(17)-C(18) | -59.86(16)  |
| C(15)-C(16)-C(17)-Fe(1) | 59.91(15)   |
| C(16)-C(17)-C(18)-C(19) | 0.4(3)      |
| Fe(1)-C(17)-C(18)-C(19) | -59.12(15)  |
| C(16)-C(17)-C(18)-Fe(1) | 59.53(16)   |
| C(17)-C(18)-C(19)-C(15) | -0.7(2)     |
| Fe(1)-C(18)-C(19)-C(15) | -59.57(13)  |
| C(17)-C(18)-C(19)-Fe(1) | 58.86(15)   |
| C(16)-C(15)-C(19)-C(18) | 0.7(2)      |
| C(7)-C(15)-C(19)-C(18)  | -176.92(18) |
| Fe(1)-C(15)-C(19)-C(18) | 59.29(14)   |
| C(16)-C(15)-C(19)-Fe(1) | -58.55(14)  |
| C(7)-C(15)-C(19)-Fe(1)  | 123.79(19)  |
| C(10)-C(11)-Fe(1)-C(12) | -117.3(3)   |
| C(12)-C(11)-Fe(1)-C(10) | 117.3(3)    |
| C(10)-C(11)-Fe(1)-C(17) | 48.3(3)     |
| C(12)-C(11)-Fe(1)-C(17) | 165.6(3)    |
| C(10)-C(11)-Fe(1)-C(13) | -79.9(2)    |
| C(12)-C(11)-Fe(1)-C(13) | 37.4(2)     |
| C(10)-C(11)-Fe(1)-C(16) | 84.14(19)   |
| C(12)-C(11)-Fe(1)-C(16) | -158.6(2)   |
| C(10)-C(11)-Fe(1)-C(14) | -37.30(17)  |
| C(12)-C(11)-Fe(1)-C(14) | 80.0(2)     |
| C(10)-C(11)-Fe(1)-C(19) | 168.43(14)  |
| C(12)-C(11)-Fe(1)-C(19) | -74.3(2)    |
| C(10)-C(11)-Fe(1)-C(18) | -157.4(4)   |
| C(12)-C(11)-Fe(1)-C(18) | -40.2(5)    |
| C(10)-C(11)-Fe(1)-C(15) | 127.43(17)  |
| C(12)-C(11)-Fe(1)-C(15) | -115.3(2)   |
| C(13)-C(12)-Fe(1)-C(11) | 118.9(3)    |
| C(13)-C(12)-Fe(1)-C(10) | 80.2(2)     |
| C(11)-C(12)-Fe(1)-C(10) | -38.75(18)  |
| C(13)-C(12)-Fe(1)-C(17) | -36.3(5)    |
| C(11)-C(12)-Fe(1)-C(17) | -155.2(4)   |
| C(11)-C(12)-Fe(1)-C(13) | -118.9(3)   |
| C(13)-C(12)-Fe(1)-C(16) | 165.7(2)    |

Electronic Supplementary Information (ESI) for the New Journal of Chemistry

|                         |             |
|-------------------------|-------------|
| C(11)-C(12)-Fe(1)-C(16) | 46.8(3)     |
| C(13)-C(12)-Fe(1)-C(14) | 36.96(18)   |
| C(11)-C(12)-Fe(1)-C(14) | -81.95(19)  |
| C(13)-C(12)-Fe(1)-C(19) | -114.47(19) |
| C(11)-C(12)-Fe(1)-C(19) | 126.62(18)  |
| C(13)-C(12)-Fe(1)-C(18) | -72.8(2)    |
| C(11)-C(12)-Fe(1)-C(18) | 168.29(16)  |
| C(13)-C(12)-Fe(1)-C(15) | -157.92(17) |
| C(11)-C(12)-Fe(1)-C(15) | 83.17(19)   |
| C(14)-C(10)-Fe(1)-C(11) | -118.8(3)   |
| C(14)-C(10)-Fe(1)-C(12) | -80.0(2)    |
| C(11)-C(10)-Fe(1)-C(12) | 38.8(2)     |
| C(14)-C(10)-Fe(1)-C(17) | 84.01(18)   |
| C(11)-C(10)-Fe(1)-C(17) | -157.21(19) |
| C(14)-C(10)-Fe(1)-C(13) | -36.5(2)    |
| C(11)-C(10)-Fe(1)-C(13) | 82.3(2)     |
| C(14)-C(10)-Fe(1)-C(16) | 127.38(17)  |
| C(11)-C(10)-Fe(1)-C(16) | -113.8(2)   |
| C(11)-C(10)-Fe(1)-C(14) | 118.8(3)    |
| C(14)-C(10)-Fe(1)-C(19) | -159.4(3)   |
| C(11)-C(10)-Fe(1)-C(19) | -40.6(5)    |
| C(14)-C(10)-Fe(1)-C(18) | 49.3(3)     |
| C(11)-C(10)-Fe(1)-C(18) | 168.1(2)    |
| C(14)-C(10)-Fe(1)-C(15) | 168.42(15)  |
| C(11)-C(10)-Fe(1)-C(15) | -72.8(2)    |
| C(18)-C(17)-Fe(1)-C(11) | 170.4(2)    |
| C(16)-C(17)-Fe(1)-C(11) | 51.4(3)     |
| C(18)-C(17)-Fe(1)-C(12) | -46.5(5)    |
| C(16)-C(17)-Fe(1)-C(12) | -165.5(4)   |
| C(18)-C(17)-Fe(1)-C(10) | -155.98(15) |
| C(16)-C(17)-Fe(1)-C(10) | 84.97(17)   |
| C(18)-C(17)-Fe(1)-C(13) | -74.8(2)    |
| C(16)-C(17)-Fe(1)-C(13) | 166.18(15)  |
| C(18)-C(17)-Fe(1)-C(16) | 119.0(2)    |
| C(18)-C(17)-Fe(1)-C(14) | -114.10(16) |
| C(16)-C(17)-Fe(1)-C(14) | 126.86(16)  |
| C(18)-C(17)-Fe(1)-C(19) | 37.52(14)   |
| C(16)-C(17)-Fe(1)-C(19) | -81.53(15)  |

Electronic Supplementary Information (ESI) for the New Journal of Chemistry

|                         |             |
|-------------------------|-------------|
| C(16)-C(17)-Fe(1)-C(18) | -119.0(2)   |
| C(18)-C(17)-Fe(1)-C(15) | 81.41(15)   |
| C(16)-C(17)-Fe(1)-C(15) | -37.64(14)  |
| C(14)-C(13)-Fe(1)-C(11) | 81.1(2)     |
| C(12)-C(13)-Fe(1)-C(11) | -38.08(19)  |
| C(14)-C(13)-Fe(1)-C(12) | 119.2(3)    |
| C(14)-C(13)-Fe(1)-C(10) | 36.88(18)   |
| C(12)-C(13)-Fe(1)-C(10) | -82.3(2)    |
| C(14)-C(13)-Fe(1)-C(17) | -72.4(2)    |
| C(12)-C(13)-Fe(1)-C(17) | 168.5(2)    |
| C(14)-C(13)-Fe(1)-C(16) | -37.6(5)    |
| C(12)-C(13)-Fe(1)-C(16) | -156.7(4)   |
| C(12)-C(13)-Fe(1)-C(14) | -119.2(3)   |
| C(14)-C(13)-Fe(1)-C(19) | -156.75(17) |
| C(12)-C(13)-Fe(1)-C(19) | 84.1(2)     |
| C(14)-C(13)-Fe(1)-C(18) | -113.8(2)   |
| C(12)-C(13)-Fe(1)-C(18) | 127.0(2)    |
| C(14)-C(13)-Fe(1)-C(15) | 167.30(19)  |
| C(12)-C(13)-Fe(1)-C(15) | 48.1(4)     |
| C(17)-C(16)-Fe(1)-C(11) | -155.96(16) |
| C(15)-C(16)-Fe(1)-C(11) | 84.62(16)   |
| C(17)-C(16)-Fe(1)-C(12) | 171.1(2)    |
| C(15)-C(16)-Fe(1)-C(12) | 51.7(3)     |
| C(17)-C(16)-Fe(1)-C(10) | -113.00(16) |
| C(15)-C(16)-Fe(1)-C(10) | 127.57(14)  |
| C(15)-C(16)-Fe(1)-C(17) | -119.4(2)   |
| C(17)-C(16)-Fe(1)-C(13) | -44.3(5)    |
| C(15)-C(16)-Fe(1)-C(13) | -163.7(4)   |
| C(17)-C(16)-Fe(1)-C(14) | -73.31(19)  |
| C(15)-C(16)-Fe(1)-C(14) | 167.26(13)  |
| C(17)-C(16)-Fe(1)-C(19) | 81.47(15)   |
| C(15)-C(16)-Fe(1)-C(19) | -37.96(12)  |
| C(17)-C(16)-Fe(1)-C(18) | 37.69(15)   |
| C(15)-C(16)-Fe(1)-C(18) | -81.74(14)  |
| C(17)-C(16)-Fe(1)-C(15) | 119.4(2)    |
| C(13)-C(14)-Fe(1)-C(11) | -82.0(2)    |
| C(10)-C(14)-Fe(1)-C(11) | 38.18(18)   |
| C(13)-C(14)-Fe(1)-C(12) | -37.6(2)    |

Electronic Supplementary Information (ESI) for the New Journal of Chemistry

|                         |             |
|-------------------------|-------------|
| C(10)-C(14)-Fe(1)-C(12) | 82.6(2)     |
| C(13)-C(14)-Fe(1)-C(10) | -120.2(3)   |
| C(13)-C(14)-Fe(1)-C(17) | 126.5(2)    |
| C(10)-C(14)-Fe(1)-C(17) | -113.28(17) |
| C(10)-C(14)-Fe(1)-C(13) | 120.2(3)    |
| C(13)-C(14)-Fe(1)-C(16) | 167.8(2)    |
| C(10)-C(14)-Fe(1)-C(16) | -71.97(19)  |
| C(13)-C(14)-Fe(1)-C(19) | 48.9(3)     |
| C(10)-C(14)-Fe(1)-C(19) | 169.13(19)  |
| C(13)-C(14)-Fe(1)-C(18) | 83.7(2)     |
| C(10)-C(14)-Fe(1)-C(18) | -156.14(15) |
| C(13)-C(14)-Fe(1)-C(15) | -158.1(4)   |
| C(10)-C(14)-Fe(1)-C(15) | -37.9(4)    |
| C(18)-C(19)-Fe(1)-C(11) | 167.56(18)  |
| C(15)-C(19)-Fe(1)-C(11) | -72.67(19)  |
| C(18)-C(19)-Fe(1)-C(12) | 125.9(2)    |
| C(15)-C(19)-Fe(1)-C(12) | -114.3(2)   |
| C(18)-C(19)-Fe(1)-C(10) | -159.9(4)   |
| C(15)-C(19)-Fe(1)-C(10) | -40.1(4)    |
| C(18)-C(19)-Fe(1)-C(17) | -37.52(14)  |
| C(15)-C(19)-Fe(1)-C(17) | 82.24(14)   |
| C(18)-C(19)-Fe(1)-C(13) | 83.3(2)     |
| C(15)-C(19)-Fe(1)-C(13) | -156.89(19) |
| C(18)-C(19)-Fe(1)-C(16) | -81.72(14)  |
| C(15)-C(19)-Fe(1)-C(16) | 38.05(12)   |
| C(18)-C(19)-Fe(1)-C(14) | 49.9(3)     |
| C(15)-C(19)-Fe(1)-C(14) | 169.6(2)    |
| C(15)-C(19)-Fe(1)-C(18) | 119.76(18)  |
| C(18)-C(19)-Fe(1)-C(15) | -119.76(18) |
| C(17)-C(18)-Fe(1)-C(11) | -162.3(4)   |
| C(19)-C(18)-Fe(1)-C(11) | -42.8(5)    |
| C(17)-C(18)-Fe(1)-C(12) | 165.6(2)    |
| C(19)-C(18)-Fe(1)-C(12) | -74.9(2)    |
| C(17)-C(18)-Fe(1)-C(10) | 50.2(3)     |
| C(19)-C(18)-Fe(1)-C(10) | 169.67(19)  |
| C(19)-C(18)-Fe(1)-C(17) | 119.5(2)    |
| C(17)-C(18)-Fe(1)-C(13) | 125.34(19)  |
| C(19)-C(18)-Fe(1)-C(13) | -115.16(18) |

Electronic Supplementary Information (ESI) for the New Journal of Chemistry

|                         |             |
|-------------------------|-------------|
| C(17)-C(18)-Fe(1)-C(16) | -38.01(14)  |
| C(19)-C(18)-Fe(1)-C(16) | 81.49(14)   |
| C(17)-C(18)-Fe(1)-C(14) | 83.85(17)   |
| C(19)-C(18)-Fe(1)-C(14) | -156.65(14) |
| C(17)-C(18)-Fe(1)-C(19) | -119.5(2)   |
| C(17)-C(18)-Fe(1)-C(15) | -82.03(15)  |
| C(19)-C(18)-Fe(1)-C(15) | 37.47(12)   |
| C(19)-C(15)-Fe(1)-C(11) | 127.65(16)  |
| C(16)-C(15)-Fe(1)-C(11) | -113.57(17) |
| C(7)-C(15)-Fe(1)-C(11)  | 6.3(2)      |
| C(19)-C(15)-Fe(1)-C(12) | 84.6(2)     |
| C(16)-C(15)-Fe(1)-C(12) | -156.6(2)   |
| C(7)-C(15)-Fe(1)-C(12)  | -36.7(3)    |
| C(19)-C(15)-Fe(1)-C(10) | 168.58(14)  |
| C(16)-C(15)-Fe(1)-C(10) | -72.64(16)  |
| C(7)-C(15)-Fe(1)-C(10)  | 47.2(2)     |
| C(19)-C(15)-Fe(1)-C(17) | -81.04(14)  |
| C(16)-C(15)-Fe(1)-C(17) | 37.74(14)   |
| C(7)-C(15)-Fe(1)-C(17)  | 157.6(2)    |
| C(19)-C(15)-Fe(1)-C(13) | 51.1(3)     |
| C(16)-C(15)-Fe(1)-C(13) | 169.8(3)    |
| C(7)-C(15)-Fe(1)-C(13)  | -70.3(4)    |
| C(19)-C(15)-Fe(1)-C(16) | -118.78(18) |
| C(7)-C(15)-Fe(1)-C(16)  | 119.9(2)    |
| C(19)-C(15)-Fe(1)-C(14) | -161.6(3)   |
| C(16)-C(15)-Fe(1)-C(14) | -42.8(4)    |
| C(7)-C(15)-Fe(1)-C(14)  | 77.1(4)     |
| C(16)-C(15)-Fe(1)-C(19) | 118.78(18)  |
| C(7)-C(15)-Fe(1)-C(19)  | -121.3(2)   |
| C(19)-C(15)-Fe(1)-C(18) | -37.34(12)  |
| C(16)-C(15)-Fe(1)-C(18) | 81.44(14)   |
| C(7)-C(15)-Fe(1)-C(18)  | -158.7(2)   |
| C(9)-C(4)-O(1)-C(3)     | 170.8(3)    |
| C(5)-C(4)-O(1)-C(3)     | -11.6(4)    |
| C(2)-C(3)-O(1)-C(4)     | -72.8(3)    |

---

Symmetry transformations used to generate equivalent atoms:
